# Supplementary material for: Protective Action Mechanisms of Launaea mucronata Extract and Its Nano-Formulation against Nephrotoxicity in Rats as Revealed via Biochemical, Histopathological, and UPLC-QTOF–MS/MS Analyses
Source: MDPI journal article supplement (doi:10.3390/metabo13070786), 2023-06-23
Supplement: s1 [file s1]

# Protective Action Mechanisms of *Launaea Mucronata* Extract and Its Nano-Formulation against Nephrotoxicity in Rats as Revealed *via* Biochemical, Histopathological and UPLC-QTOF–MS/MS Analyses

Amany A. El-Fadaly <sup>1,†</sup>, Inas Y. Younis <sup>2,†</sup>, Mohamed F. Abdelhameed <sup>1,†</sup>, Yasmine H. Ahmed <sup>3</sup>, Tamer I.M. Ragab <sup>4</sup>, Abd El-Nasser G. El Gendy <sup>5</sup>, Mohamed A. Farag <sup>2</sup>, Abdelsamed I. Elshamy <sup>6,\*</sup> and Abdelbaset M. Elgamal <sup>4,\*</sup>

1 Pharmacology Department, National Research Centre, 33 El Bohouth St., Dokki, Giza 12622, Egypt; aa.elfadaly@nrc.sci.eg (A.A.E-F.), mf.abdelhameed@nrc.sci.eg (M.F.A.)

2 Pharmacognosy Department, Faculty of Pharmacy, Cairo University, Kasr el Aini St., Cairo 11562, Egypt; inas.younis@pharma.cu.edu.eg (I.Y.Y.), mohamed.farag@pharma.cu.edu.eg (M.A.F.)

3 Department of Cytology and Histology, Faculty of Veterinary Medicine, Cairo University, Giza, 12211, Egypt; yasmine\_hamdi@cu.edu.eg (Y.H.A.)

4 Department of Chemistry of Microbial and Natural Products, National Research Centre, 33 El-Bohouth St., Dokki, Giza 12622, Egypt; ti.ragab@nrc.sci-eg (T.I.M.R.)

5 Medicinal and Aromatic Plants Research Department, National Research Centre, Dokki, Giza 12622, Egypt; ag.el-gendy@nrc.sci.eg (A-E. G. E-G.)

6 Chemistry of Natural Compounds Department, National Research Centre, 33 El Bohouth St., Dokki, Giza 12622, Egypt

\* Correspondence: algamalgene@yahoo.com (A.M.E.); elshamynrc@yahoo.com (A.I.E.); Tel.: +20-100-155-8689 (A.M.E.); +20-100-552-5108 (A.I.E.)

† These authors contributed equally to this work.

**12hr light /12hr dark**  
**22–25 °C, 50–60% humidity**

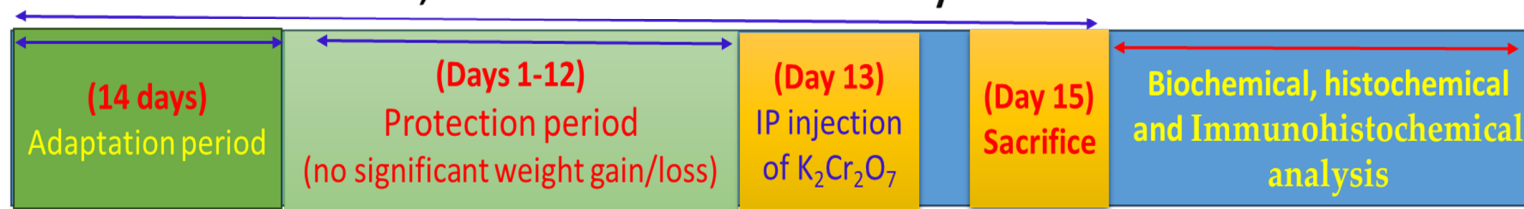

**Figure S1.** Experimental design and time cycle.

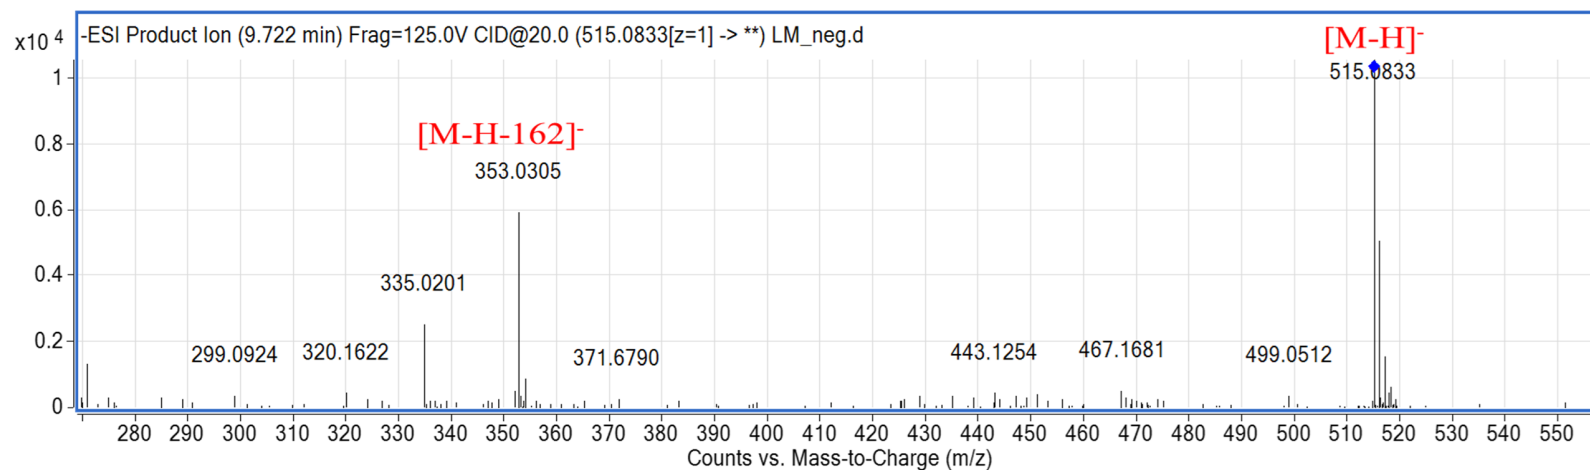

**Figure S2.** Negative mode MS/MS spectrum of chlorogenic acid hexoside.

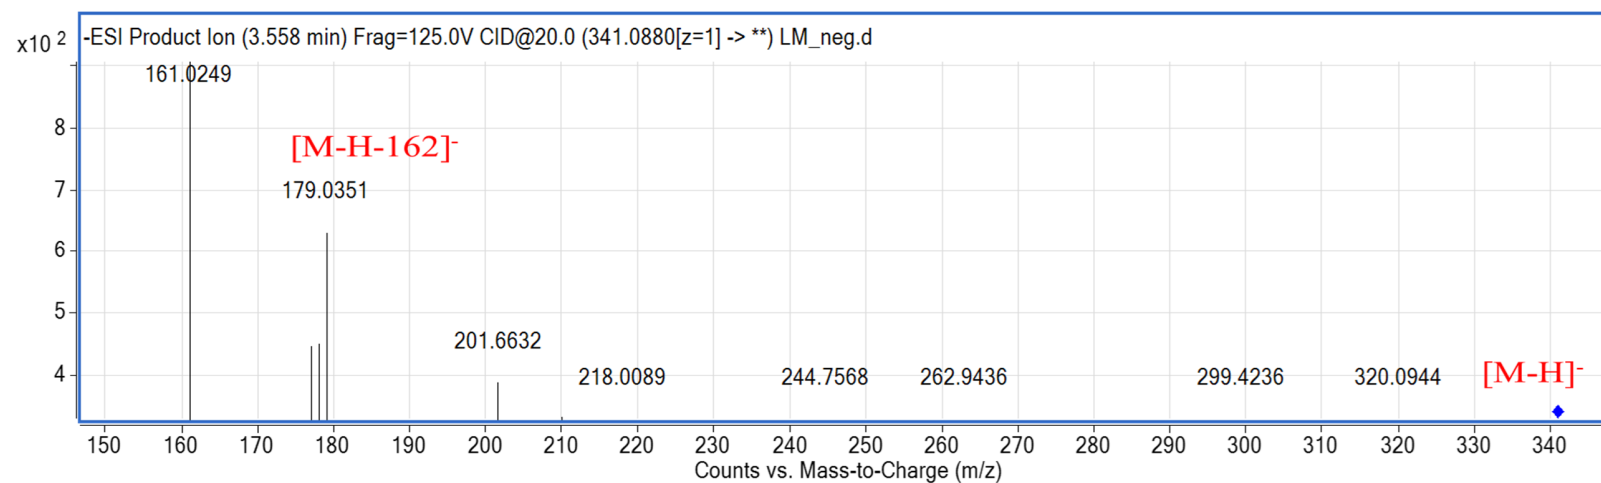

**Figure S3:** Negative mode MS/MS spectrum of caffeoyl hexoside.

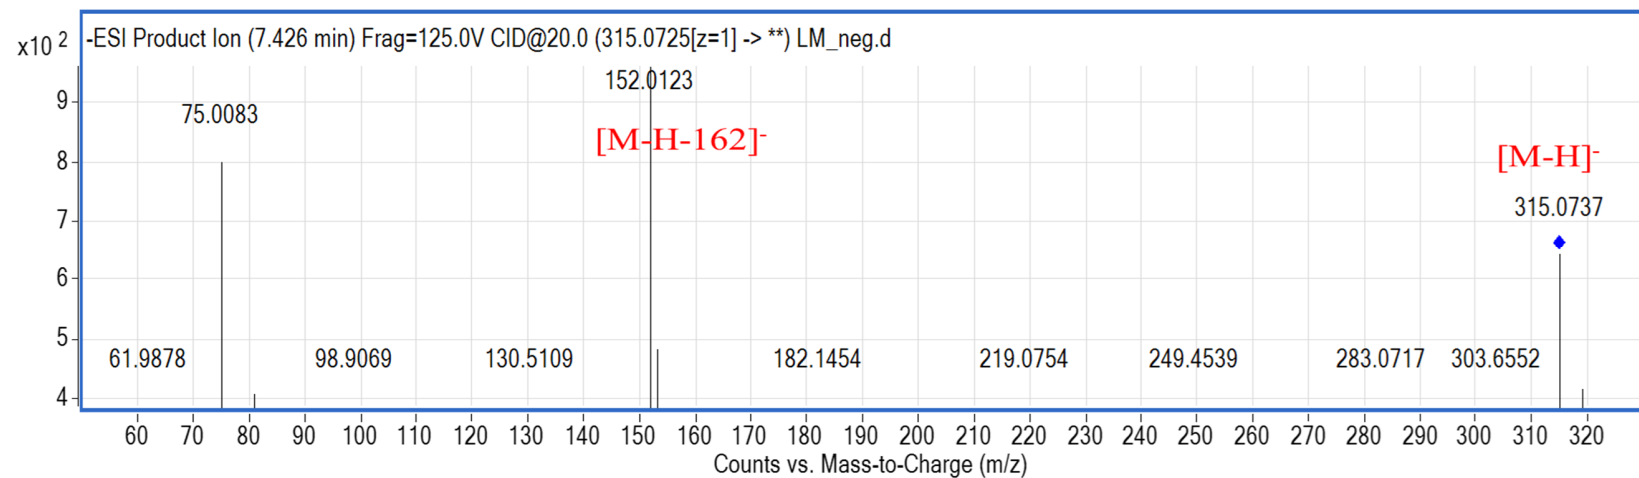

**Figure S4:** Negative mode MS/MS spectrum of protocatechuic acid hexoside.

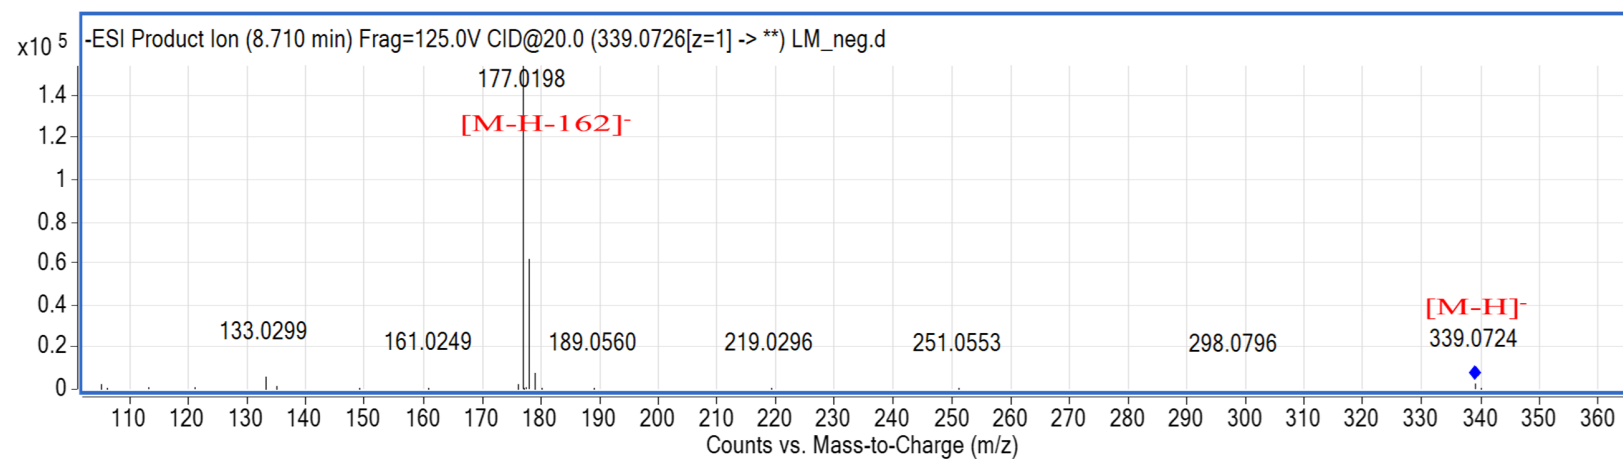

**Figure S5:** Negative mode MS/MS spectrum of aesculin.

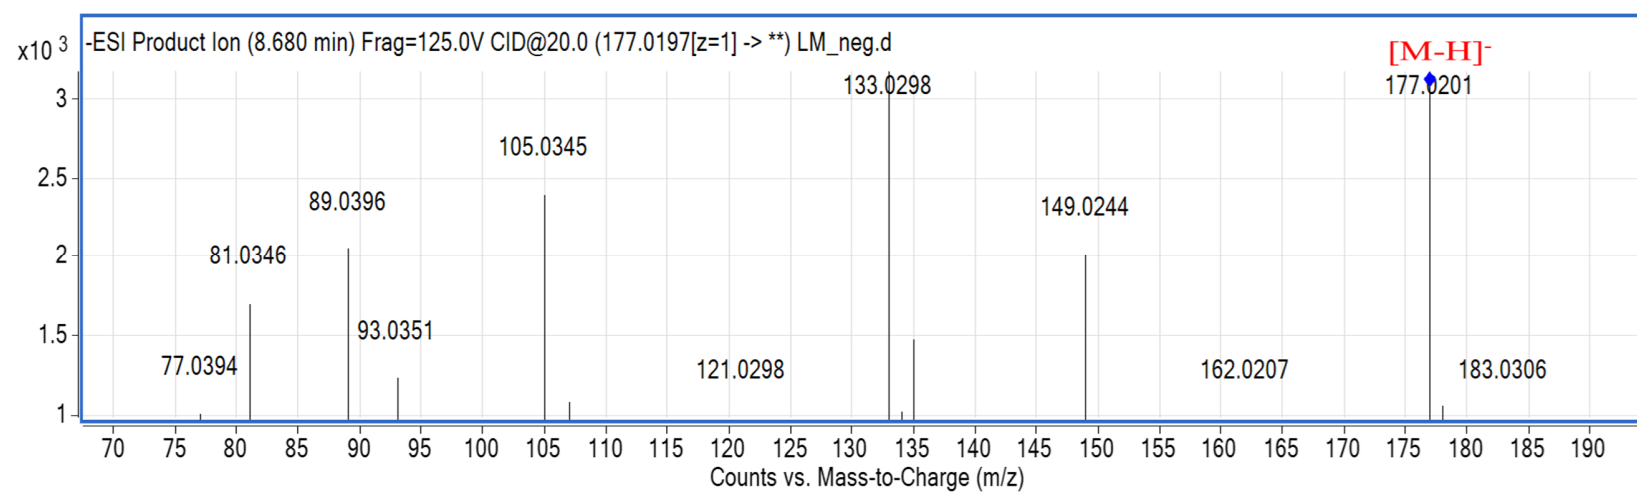

**Figure S6:** Negative mode MS/MS spectrum of aesculetin.



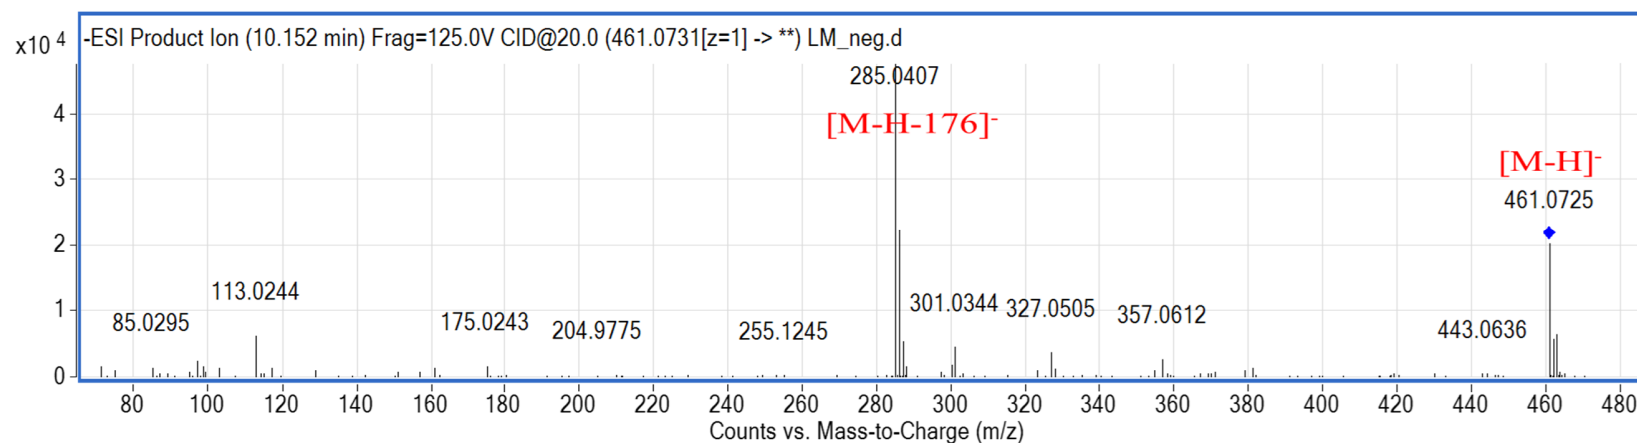

**Figure S7:** Negative mode MS/MS spectrum of luteolin-O-glucuronic acid.

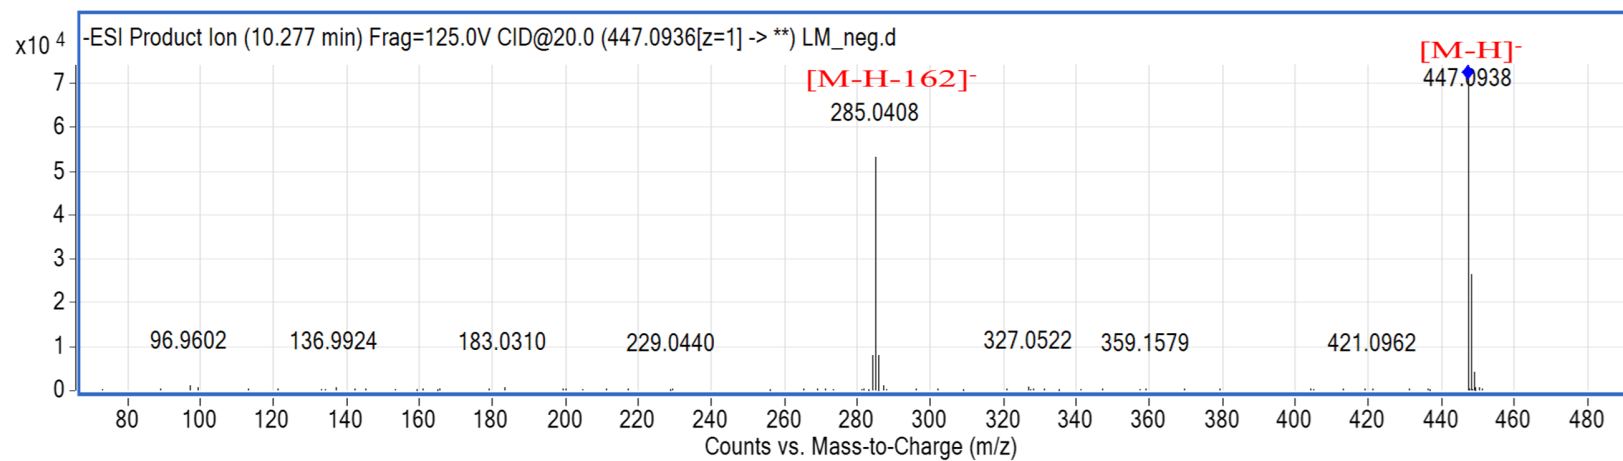

**Figure S8:** Negative mode MS/MS spectrum of luteolin-O-hexoside.

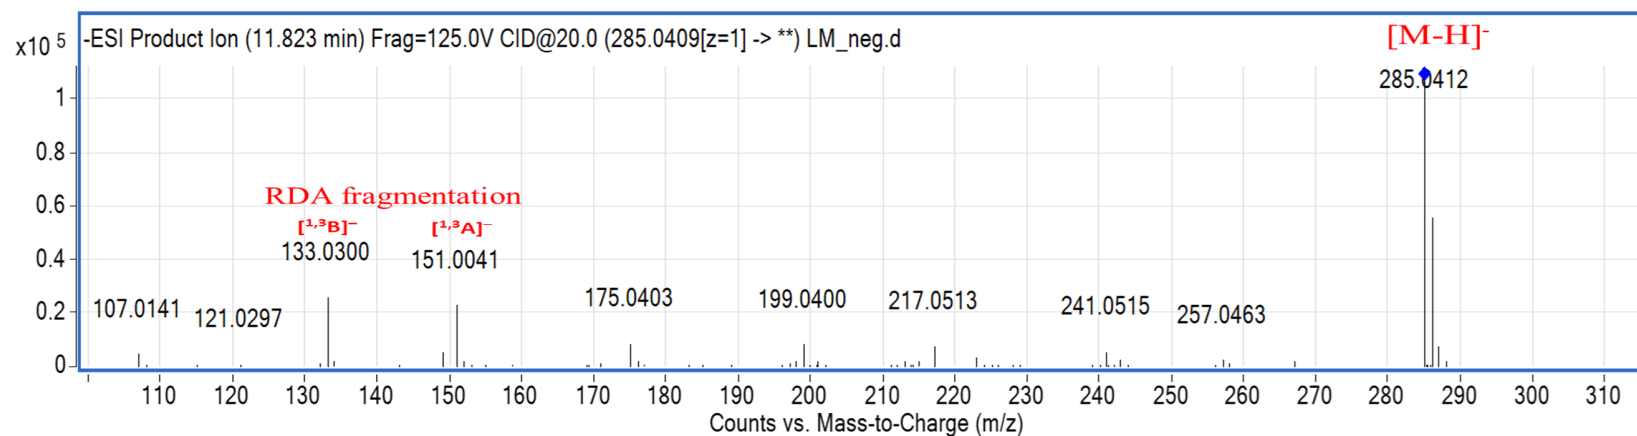

**Figure S9:** Negative mode MS/MS spectrum of luteolin.

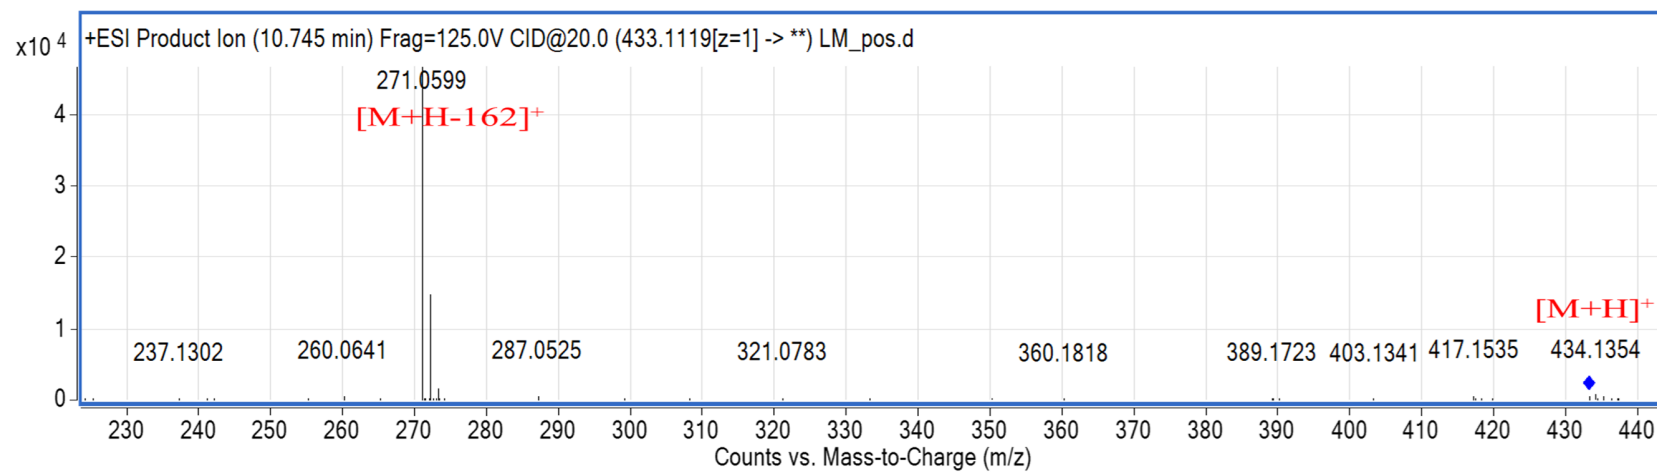

**Figure S10:** Negative mode MS/MS spectrum of apigenin-O-hexoside.

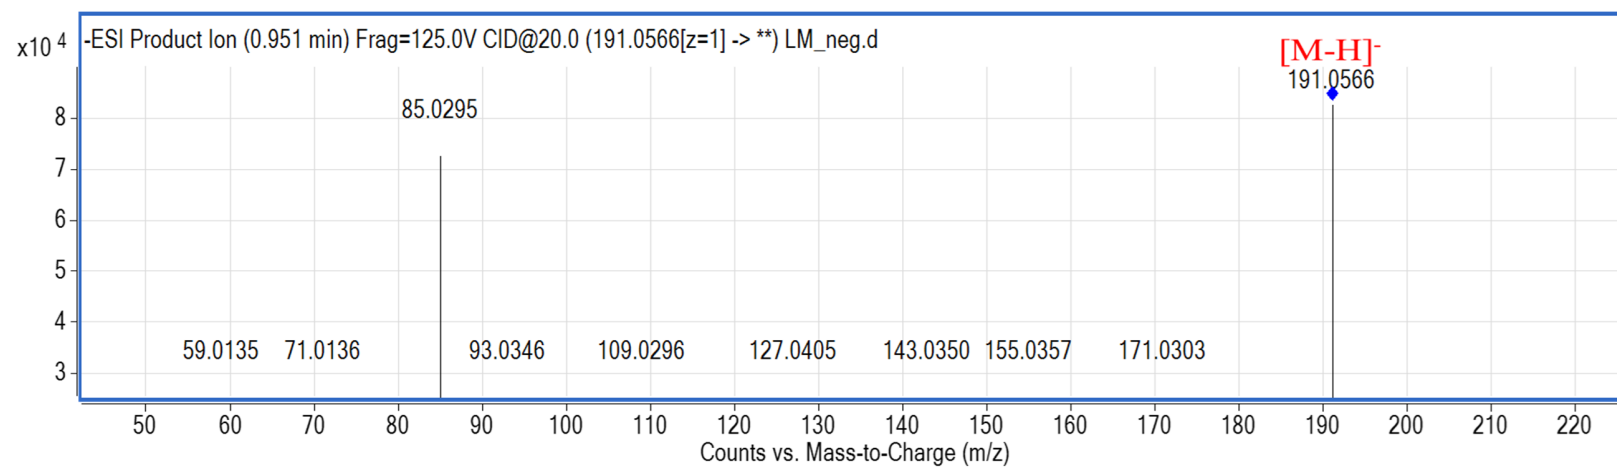

**Figure S11:** Negative mode MS/MS spectrum of quinic acid.

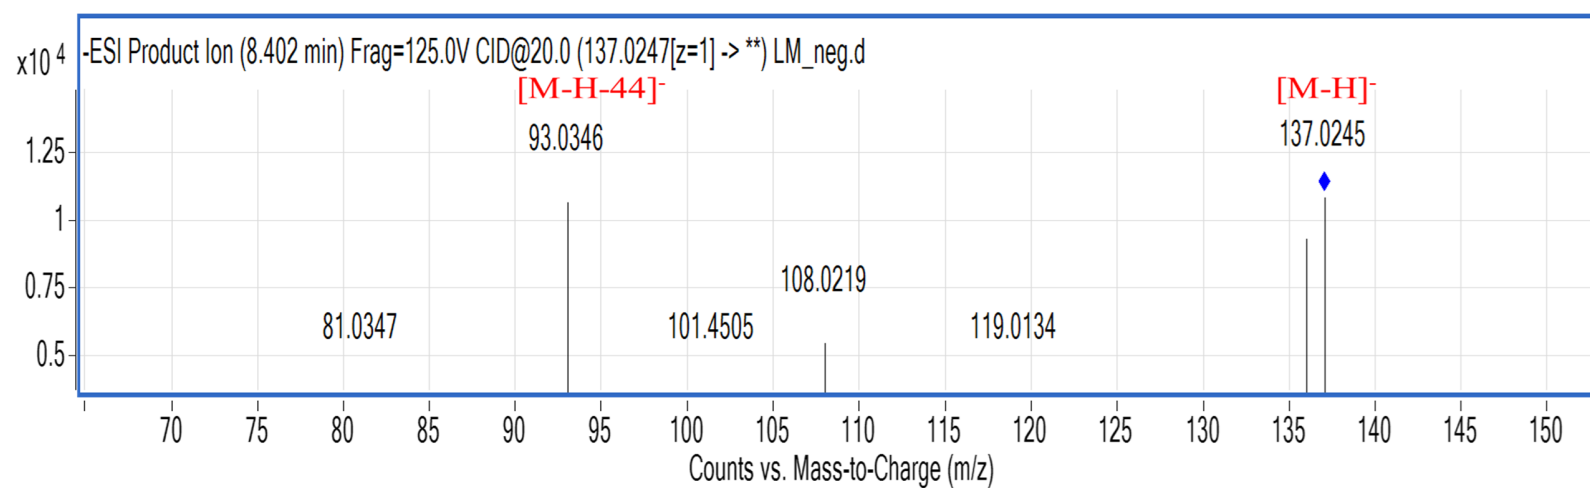

**Figure S12:** Negative mode MS/MS spectrum of salicylic acid.

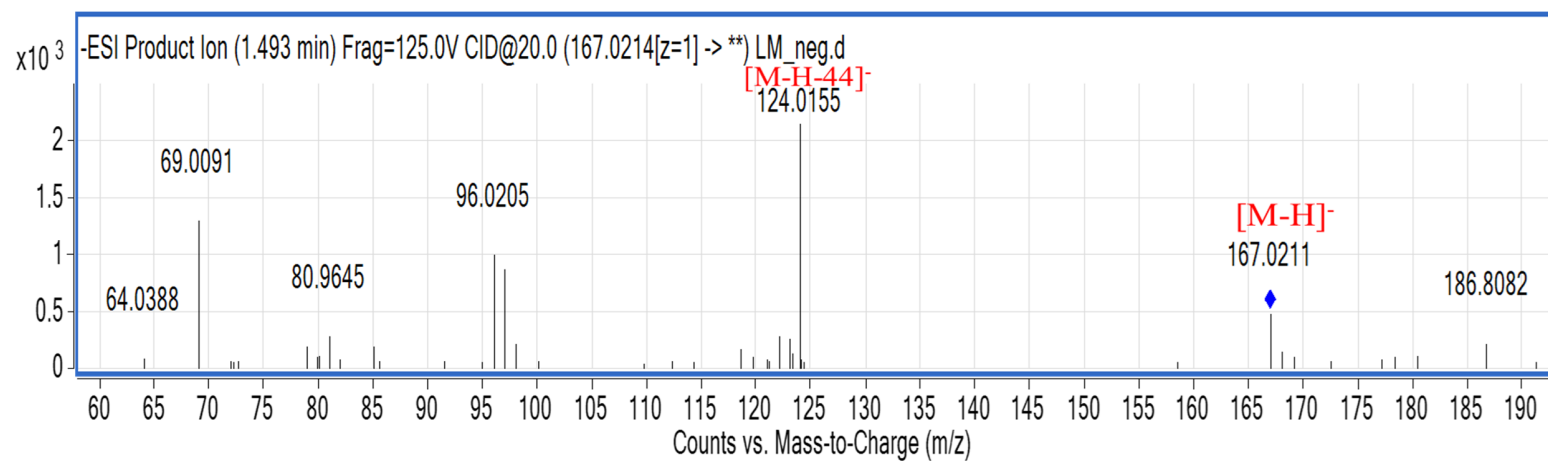

Figure S13: Negative mode MS/MS spectrum of tartaric acid.

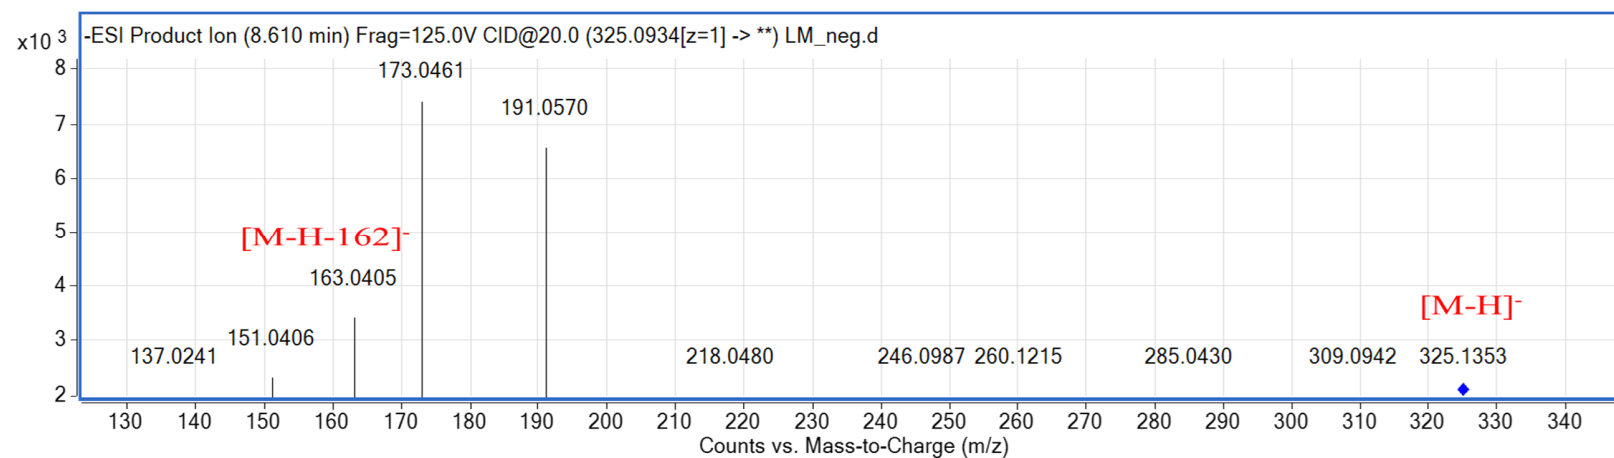

Figure S14: Negative mode MS/MS spectrum of coumaroyl hexoside.

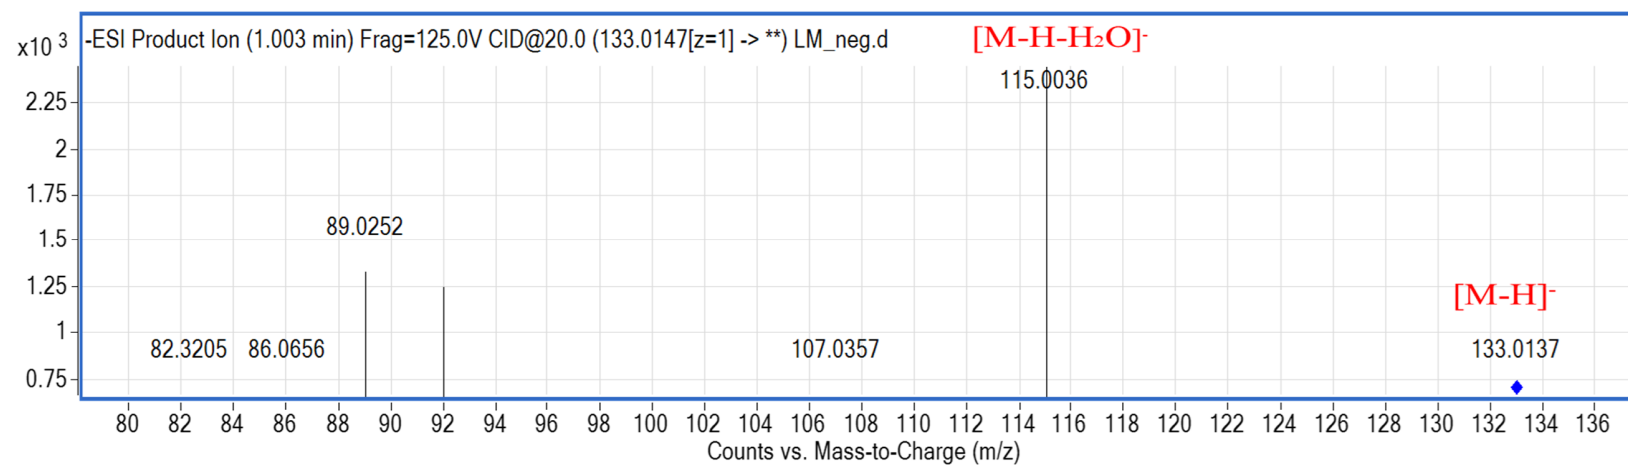

**Figure S15:** Negative mode MS/MS spectrum of malic acid.

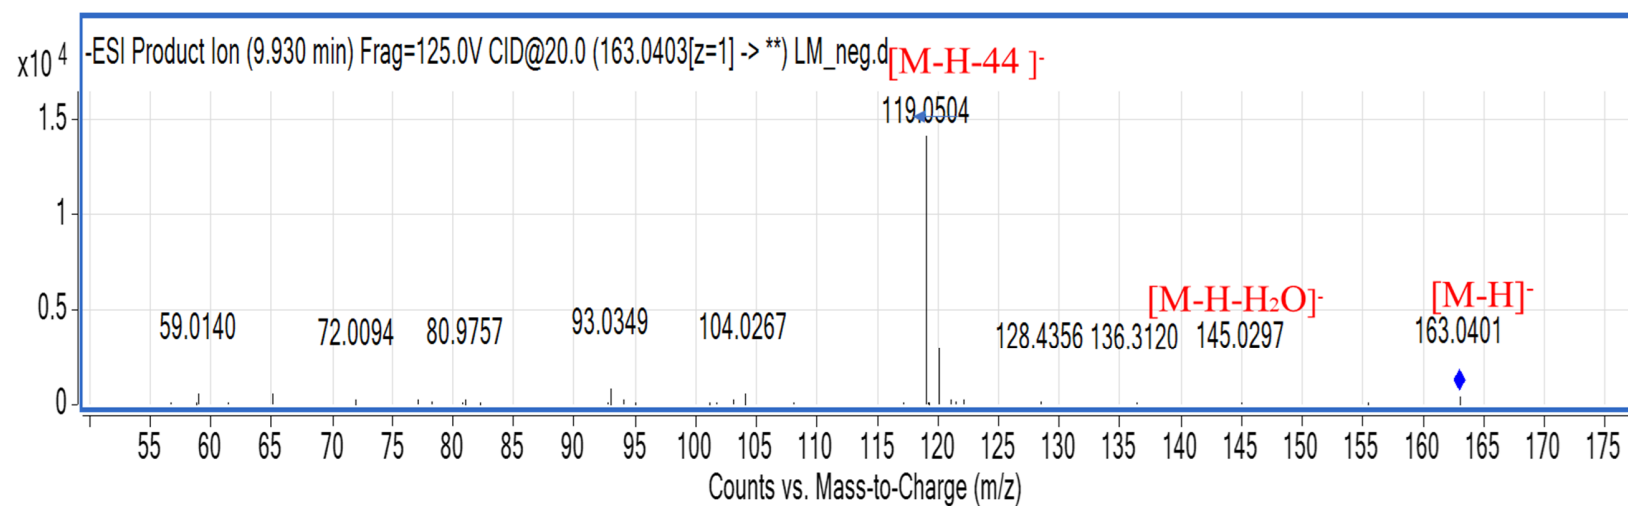

**Figure S16:** Negative mode MS/MS spectrum of *P*-hydroxy benzoic acid.

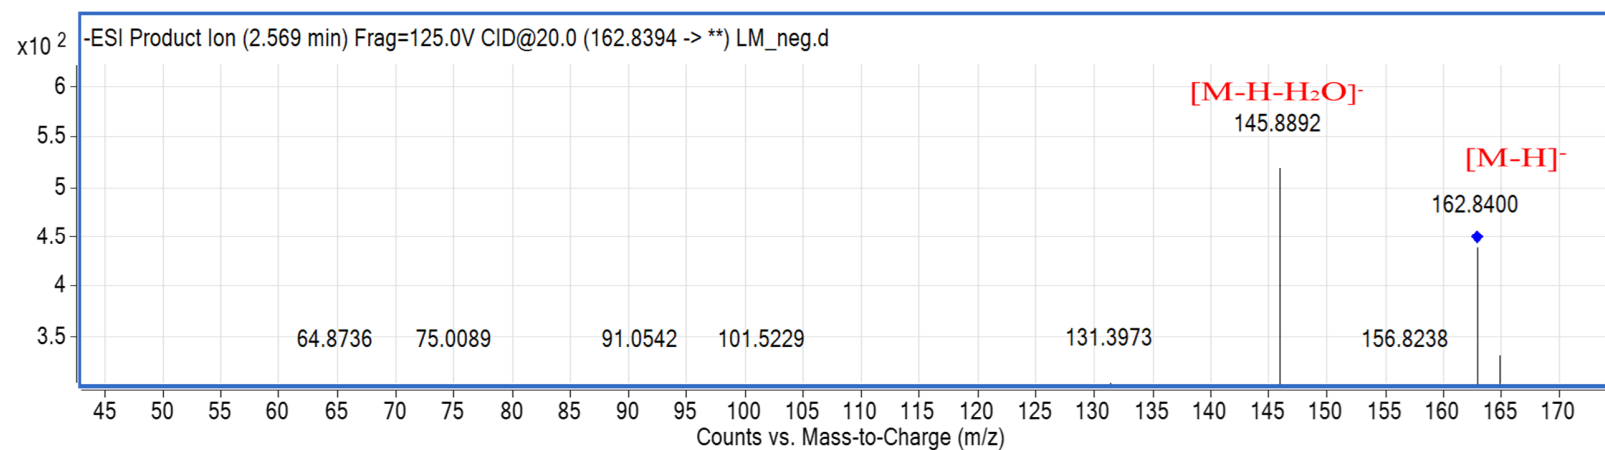

**Figure S17:** Negative mode MS/MS spectrum of *P*-coumaric acid.

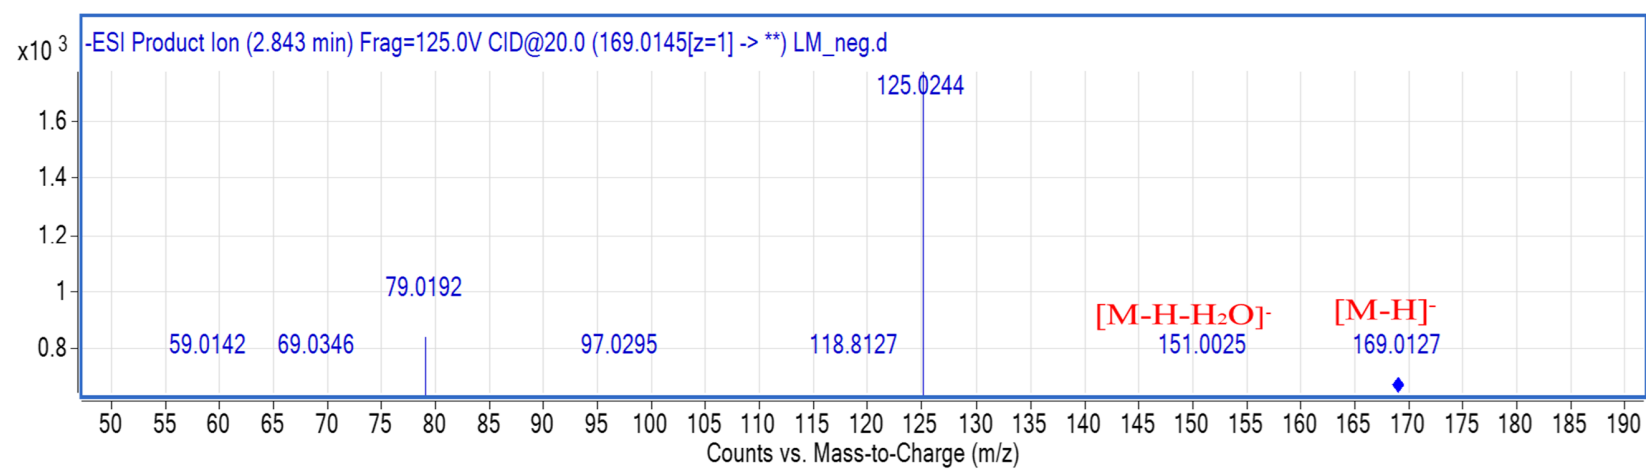

**Figure S18:** Negative mode MS/MS spectrum of gallic acid.

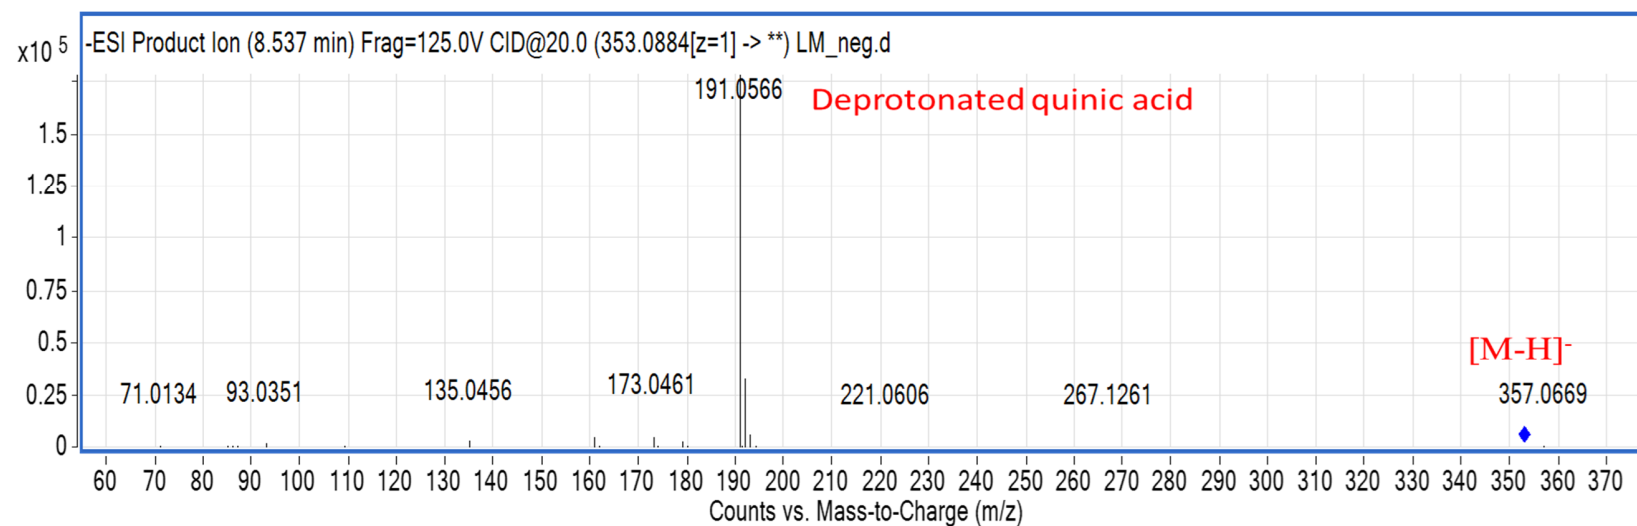

**Figure S19:** Negative mode MS/MS spectrum of chlorogenic acid.

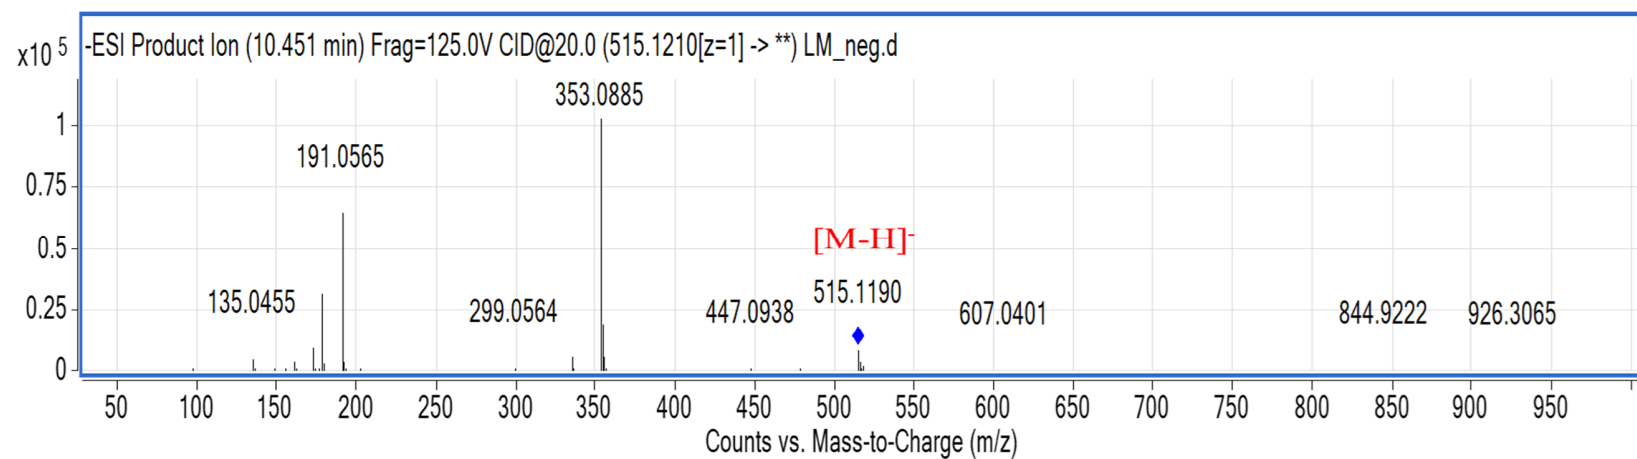

**Figure S20:** Negative mode MS/MS spectrum of dicaffeoylquinic acid.

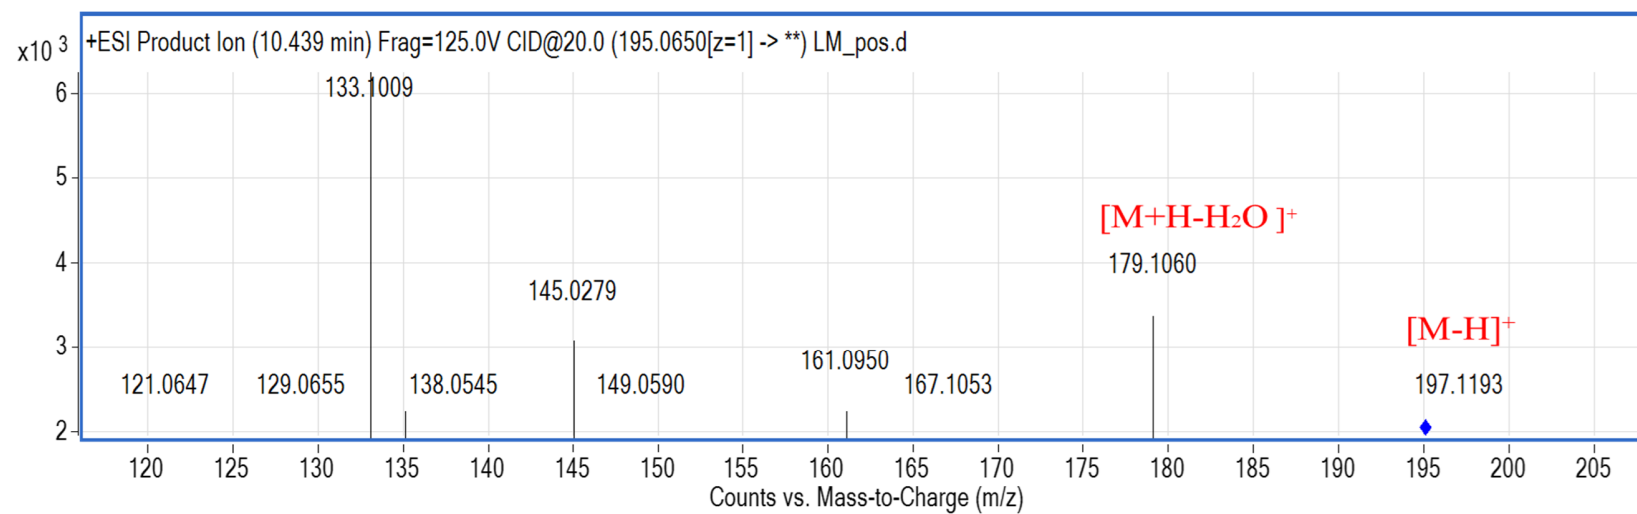

Figure S21: Negative mode MS/MS spectrum of ferulic acid.

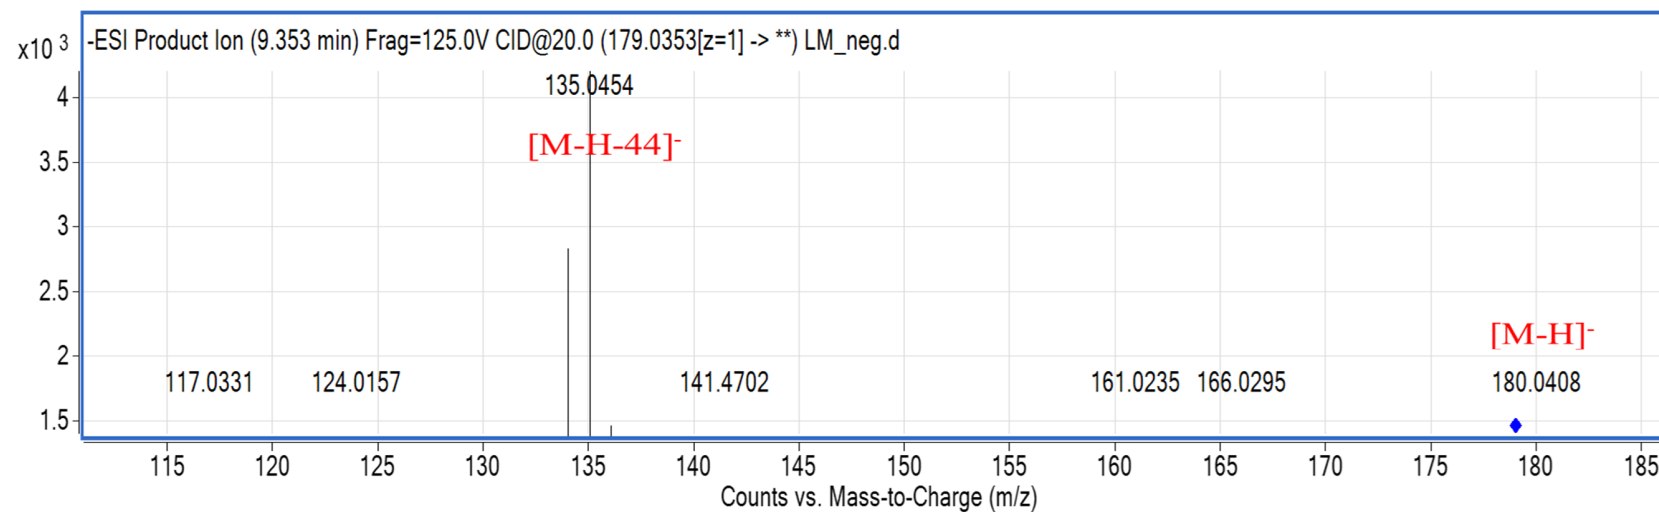

Figure S22: Negative mode MS/MS spectrum of caffeic acid.



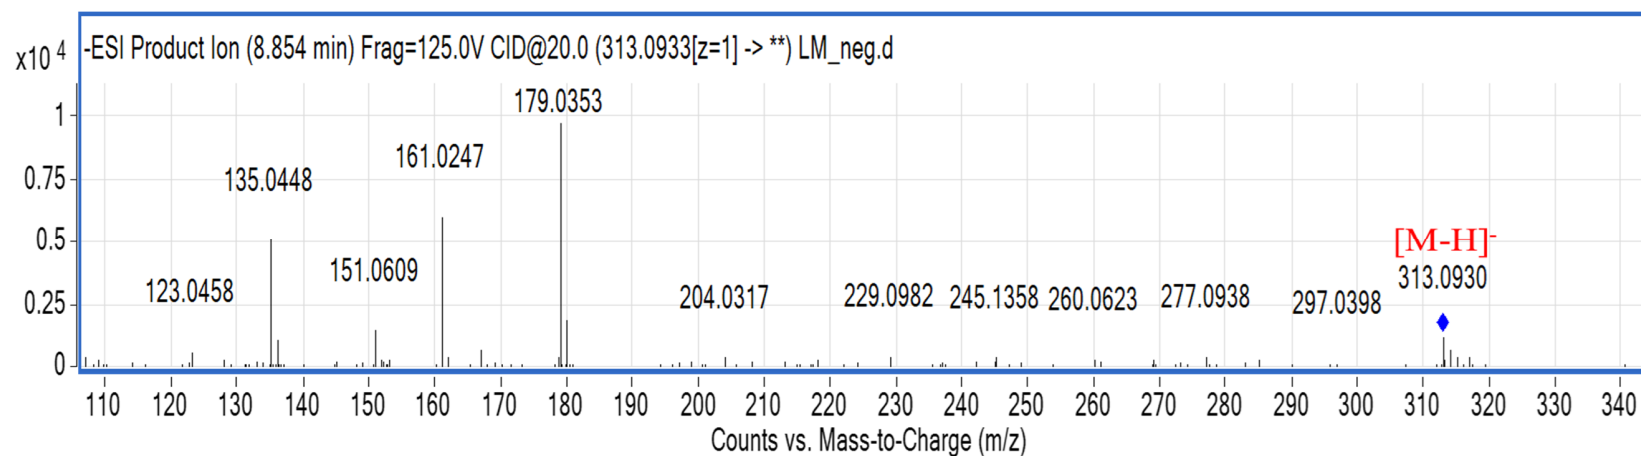

**Figure S23:** Negative mode MS/MS spectrum of caffeic acid derivative.

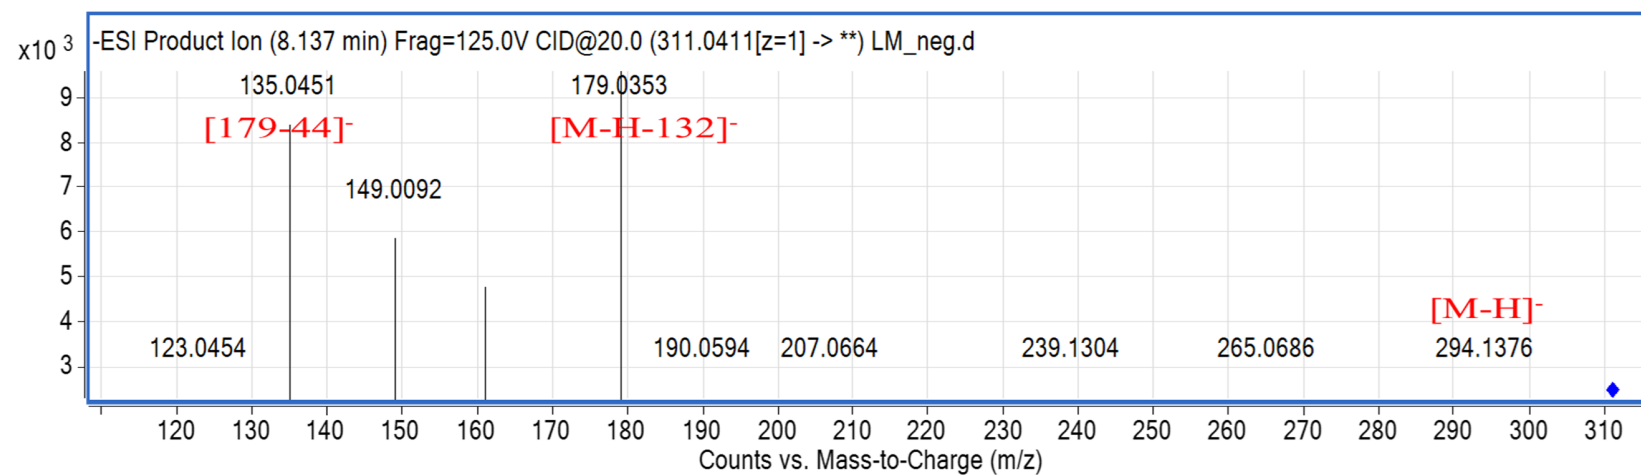

**Figure S24:** Negative mode MS/MS spectrum of caffeoyl tartaric acid.

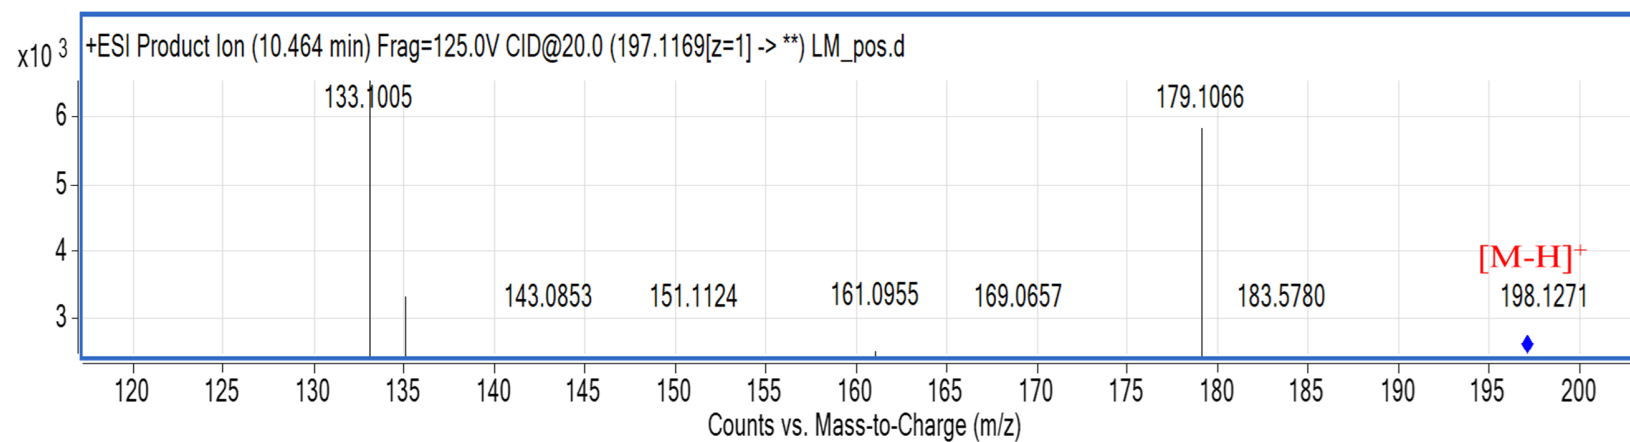

**Figure S25:** Negative mode MS/MS spectrum of unknown phenolic acid.

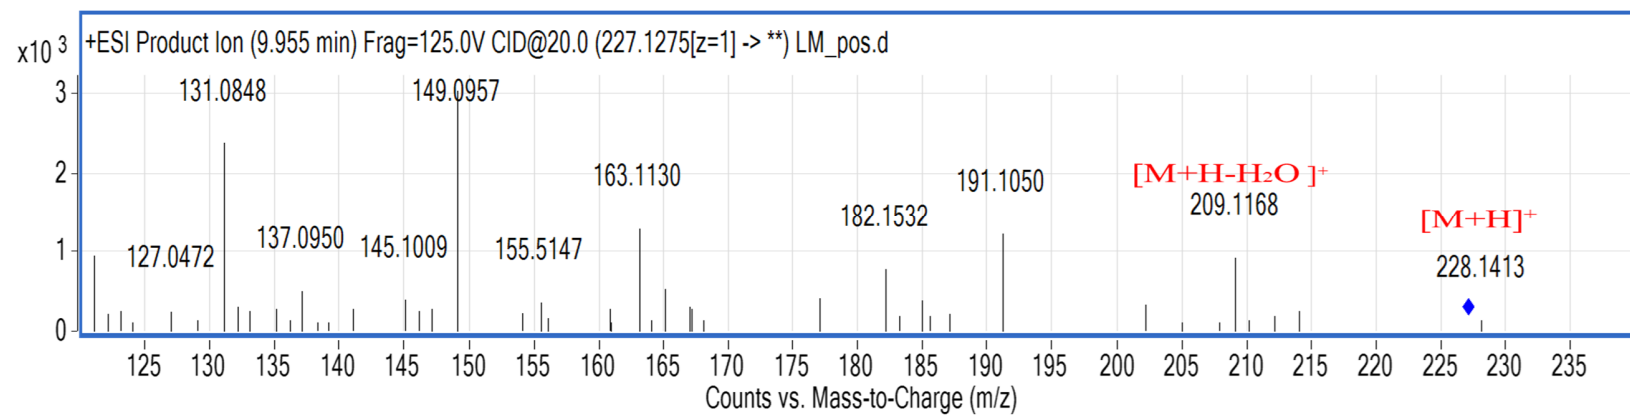

**Figure S26:** Negative mode MS/MS spectrum of hydroxy jasmonic acid.

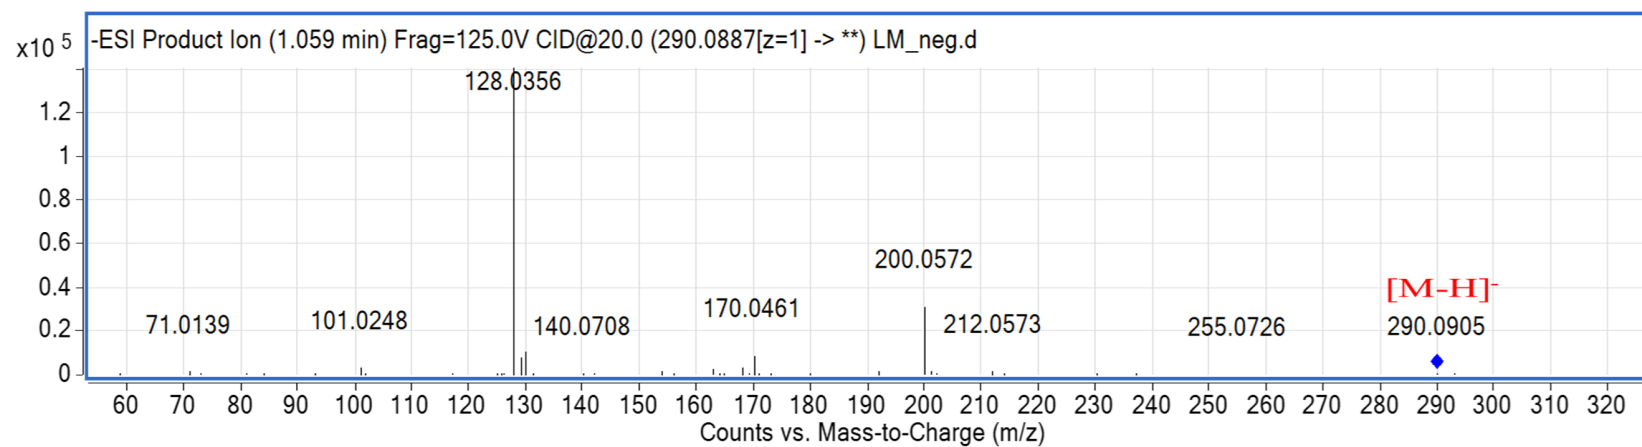

**Figure S27:** Negative mode MS/MS spectrum of deoxy-dehydro-*N*-acetylneuraminic acid.

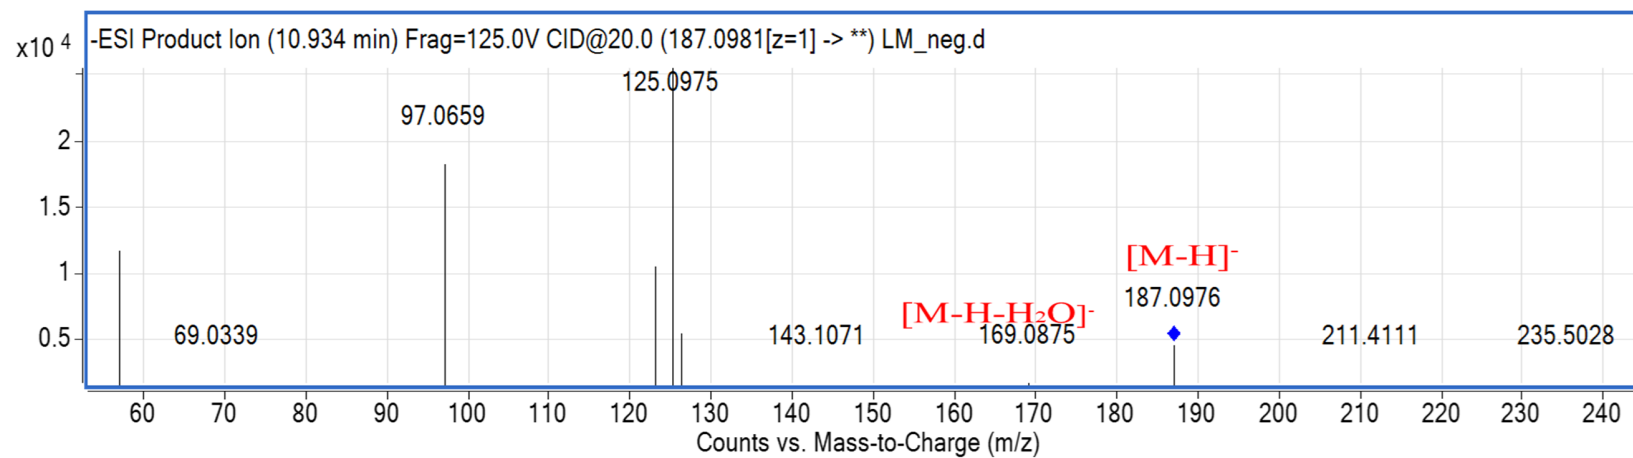

**Figure S28:** Negative mode MS/MS spectrum of nonanedioic acid.

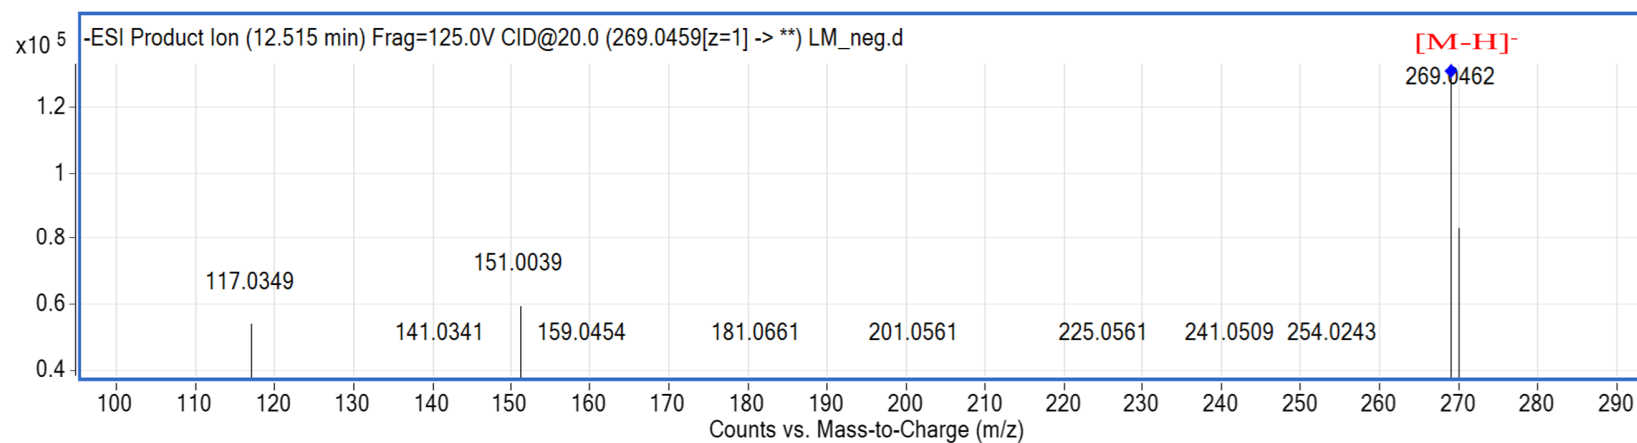

Figure S29: Negative mode MS/MS spectrum of apigenin.

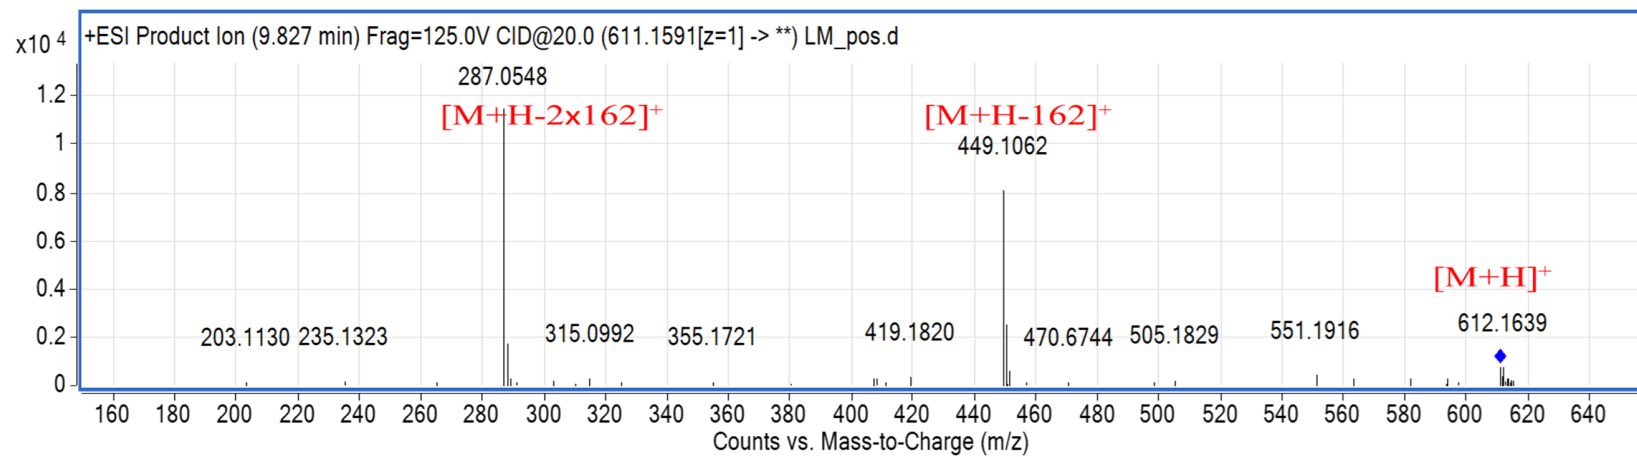

Figure S30: Positive mode MS/MS spectrum of luteolin-O-dihexoside.

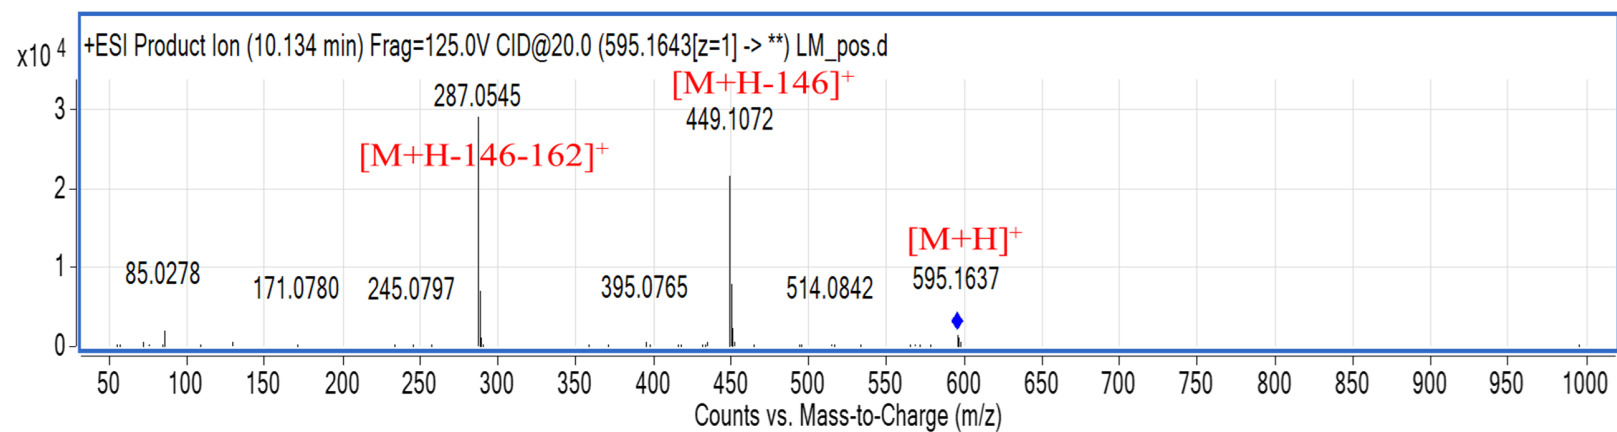

Figure S31: Positive mode MS/MS spectrum of luteolin-*O*-rutinoside.

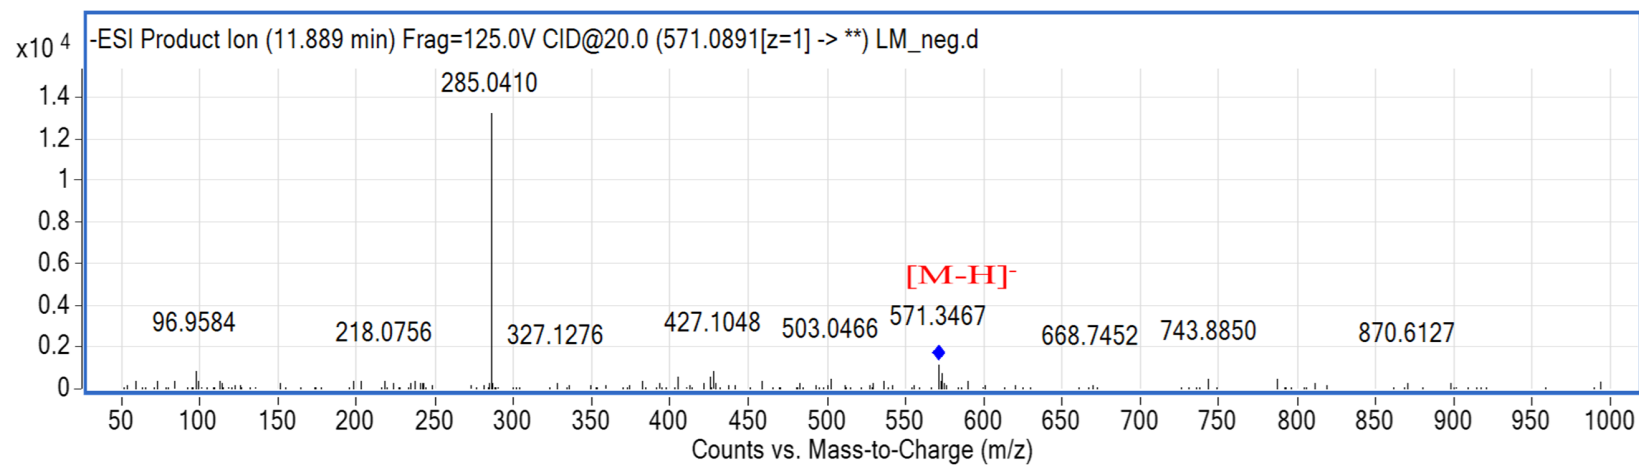

Figure S32: Negative mode MS/MS spectrum of unknown luteolin derivative.

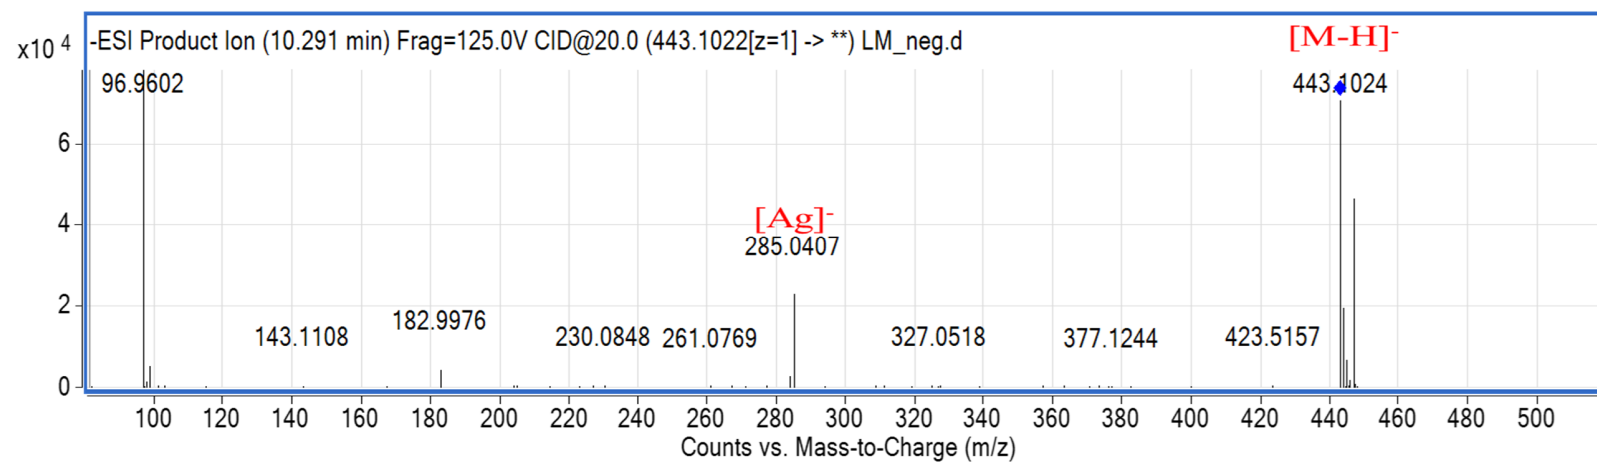

Figure S33: Negative mode MS/MS spectrum of unknown luteolin derivative.

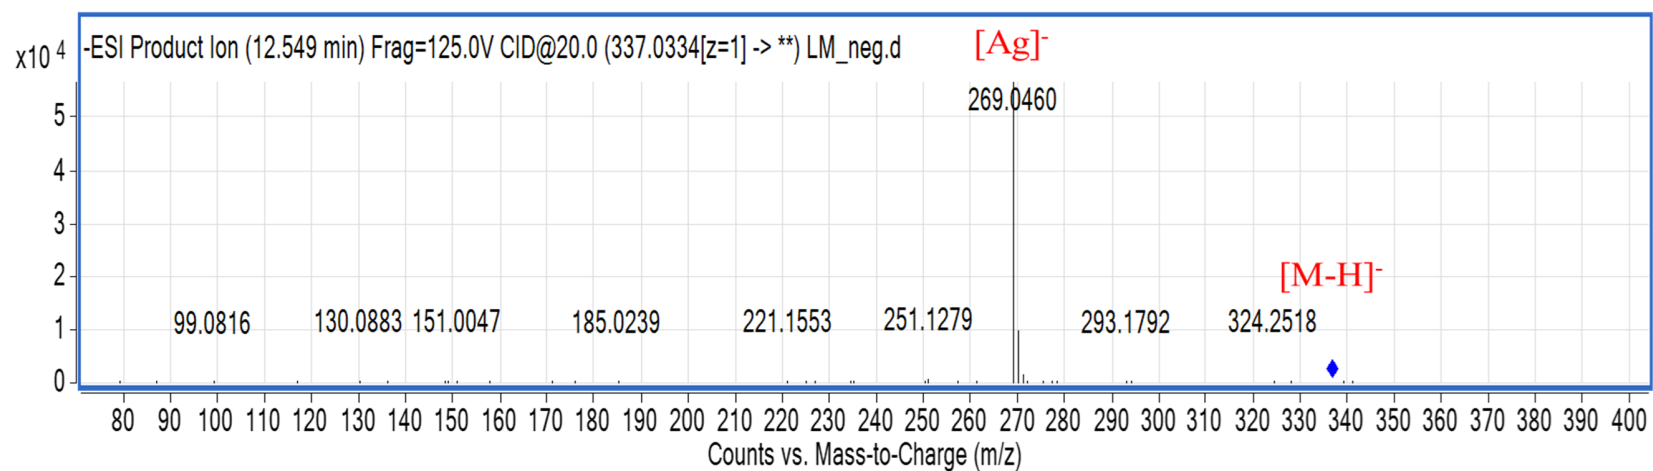

Figure S34: Negative mode MS/MS spectrum of unknown apigenin derivative.

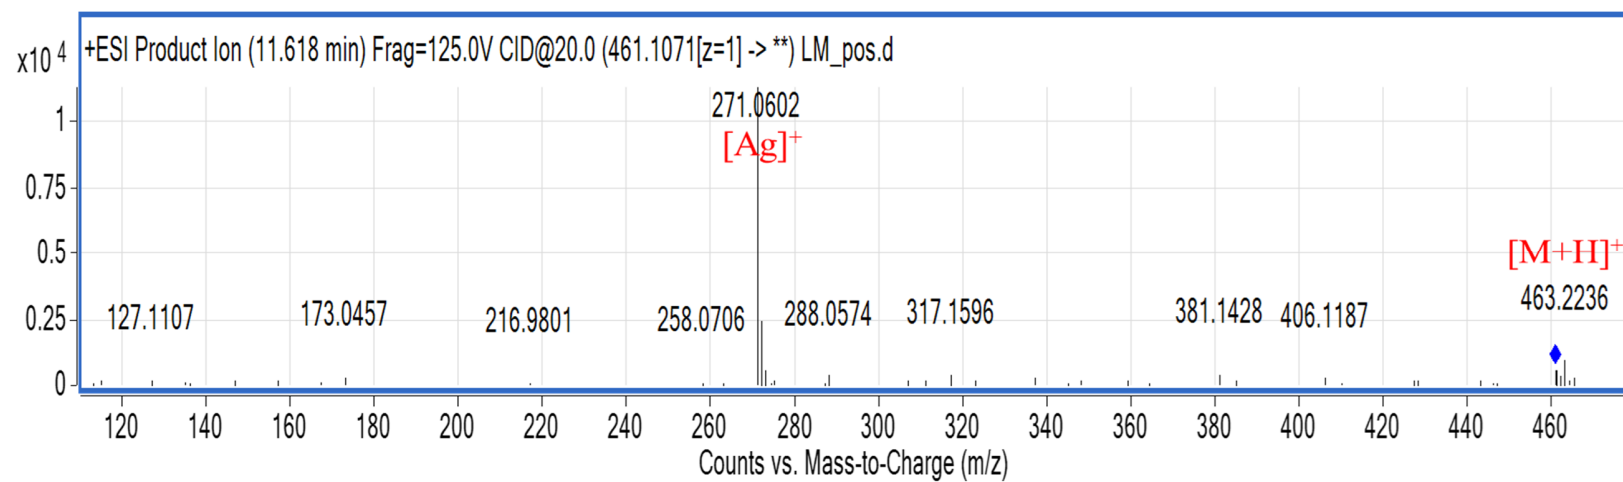

**Figure S35:** Positive mode MS/MS spectrum of unknown apigenin derivative.

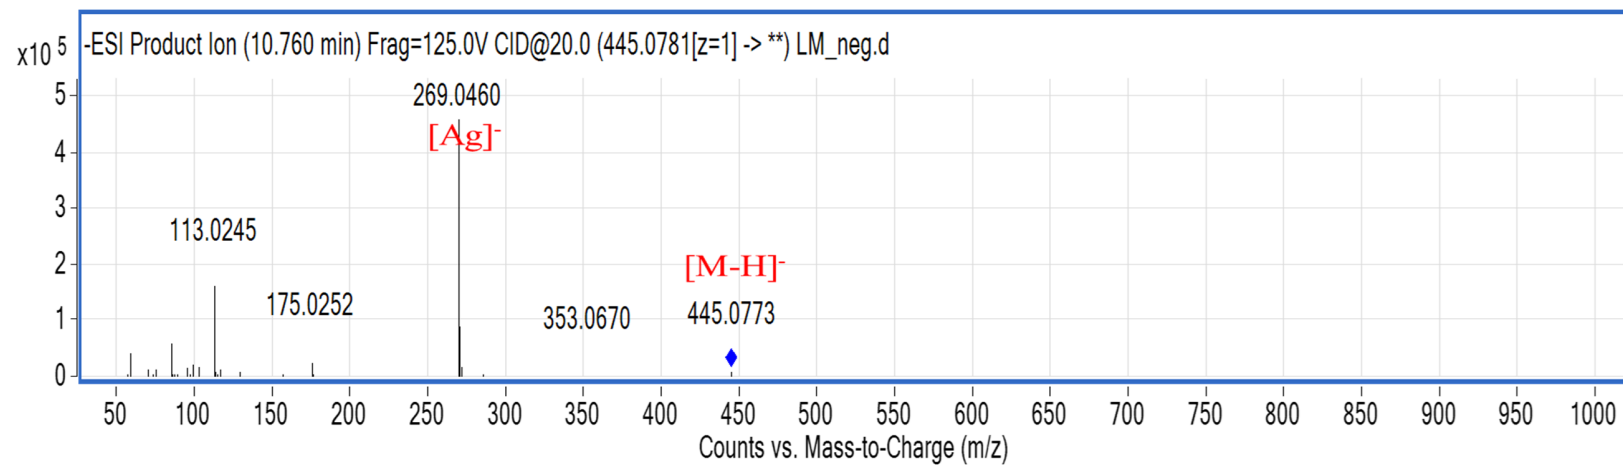

**Figure S36:** Negative mode MS/MS spectrum of unknown apigenin derivative.

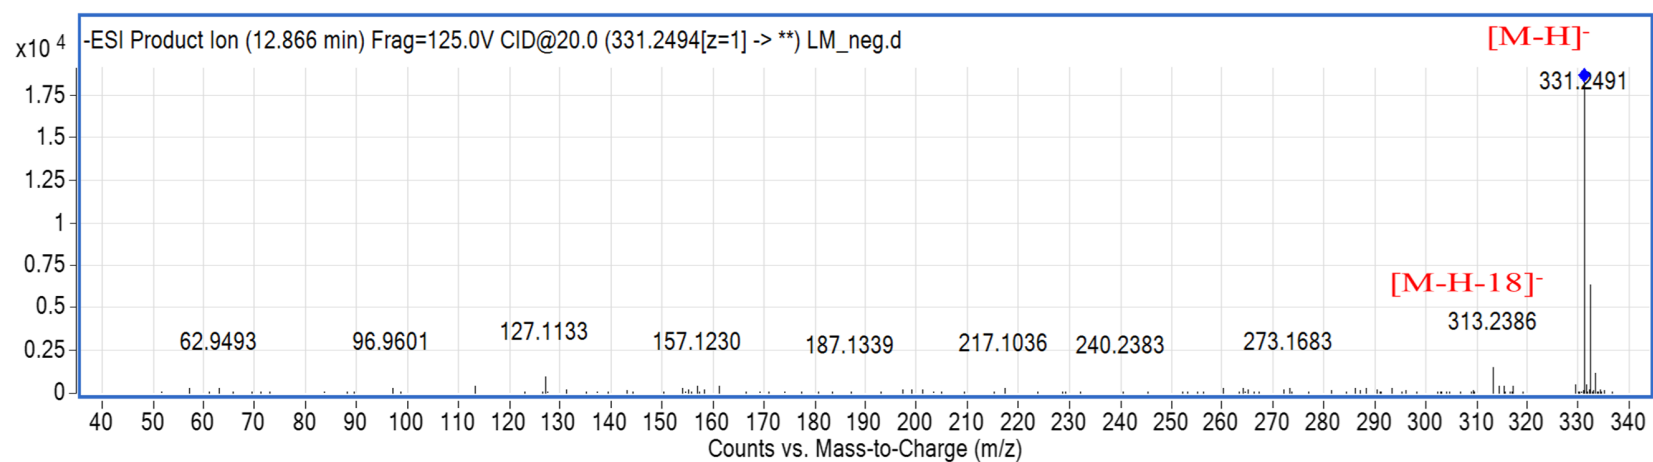

Figure S37: Negative mode MS/MS spectrum of trihydroxy octadecanoic acid.

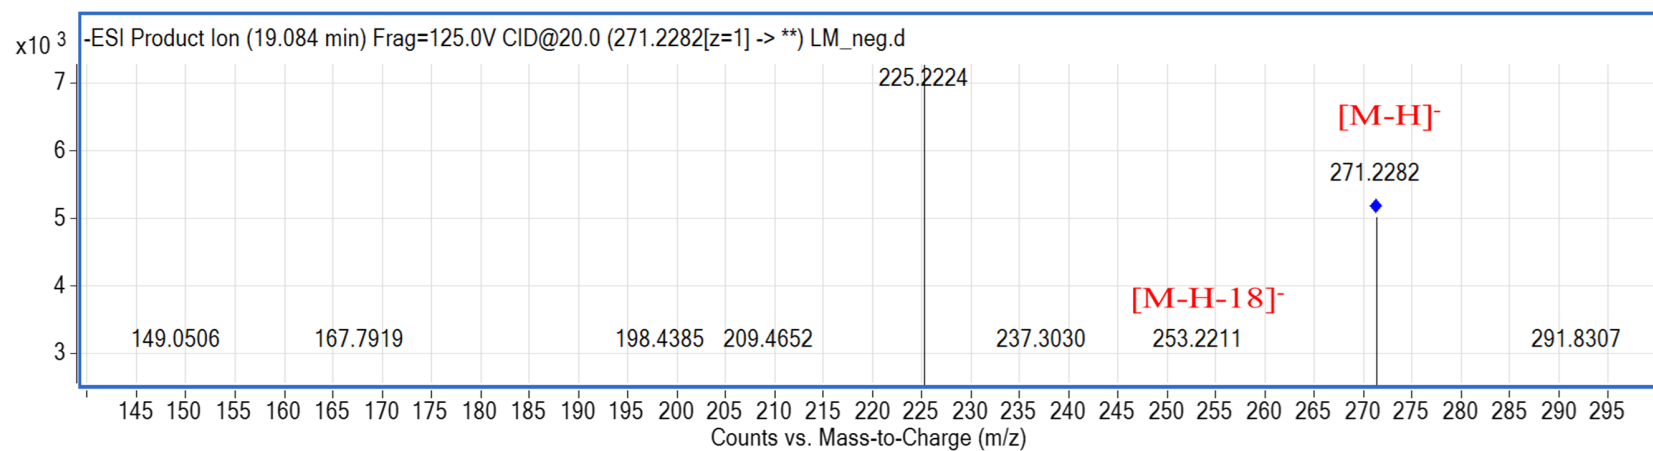

Figure S38: Negative mode MS/MS spectrum of hydroxy palmitic acid.



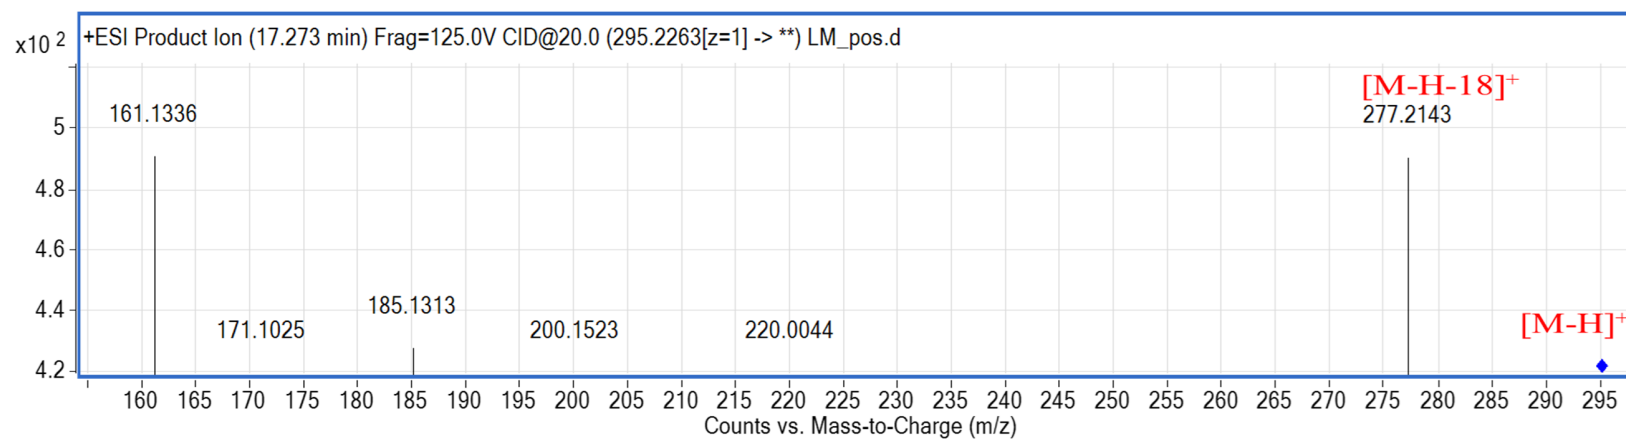

Figure S39: Positive mode MS/MS spectrum of hydroxy linoleic acid.

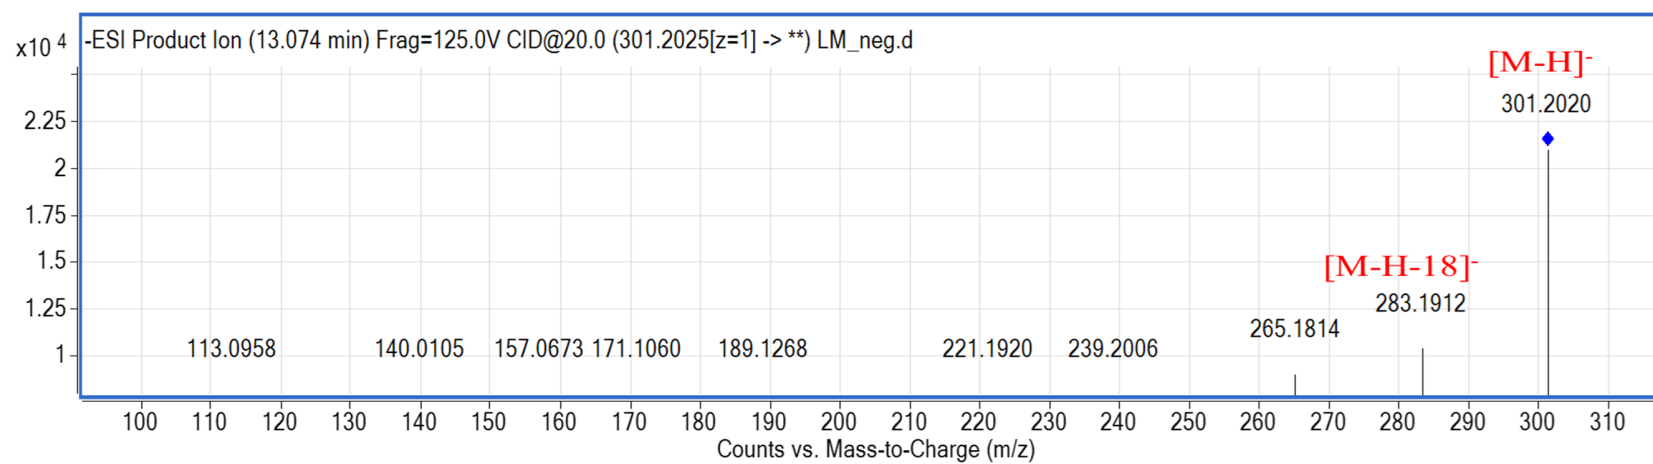

Figure S40: Negative mode MS/MS spectrum of hydroxy hexadecanedioic.

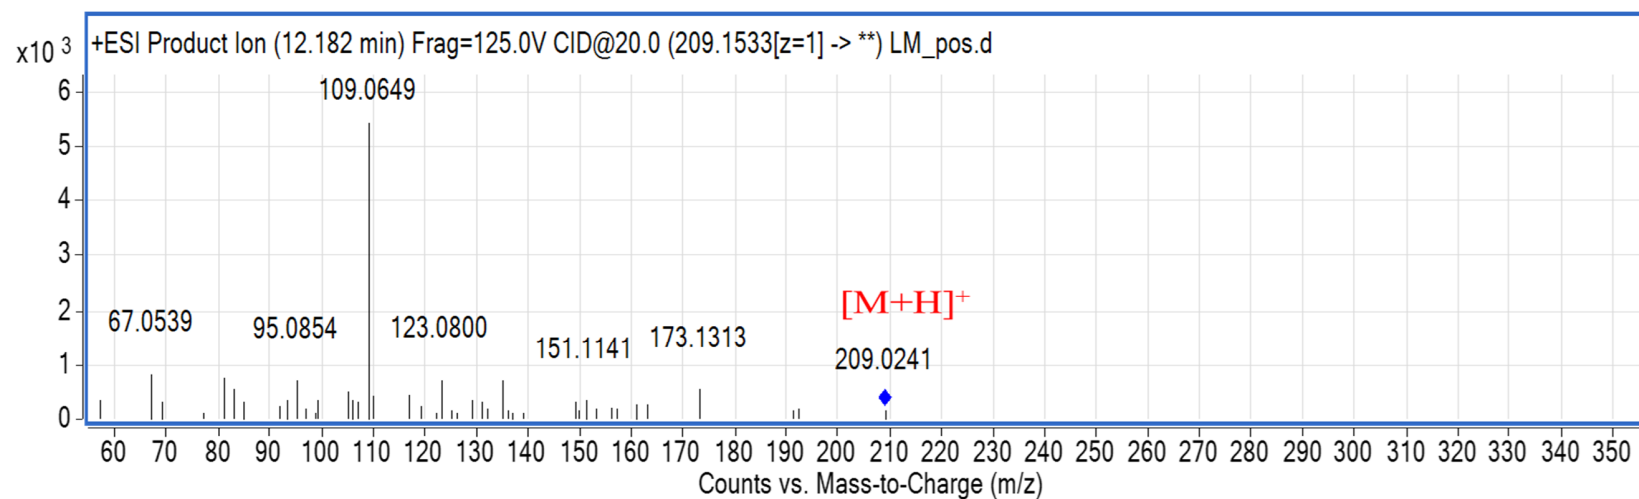

**Figure S41:** Negative mode MS/MS spectrum of tridecatrienoic acid.

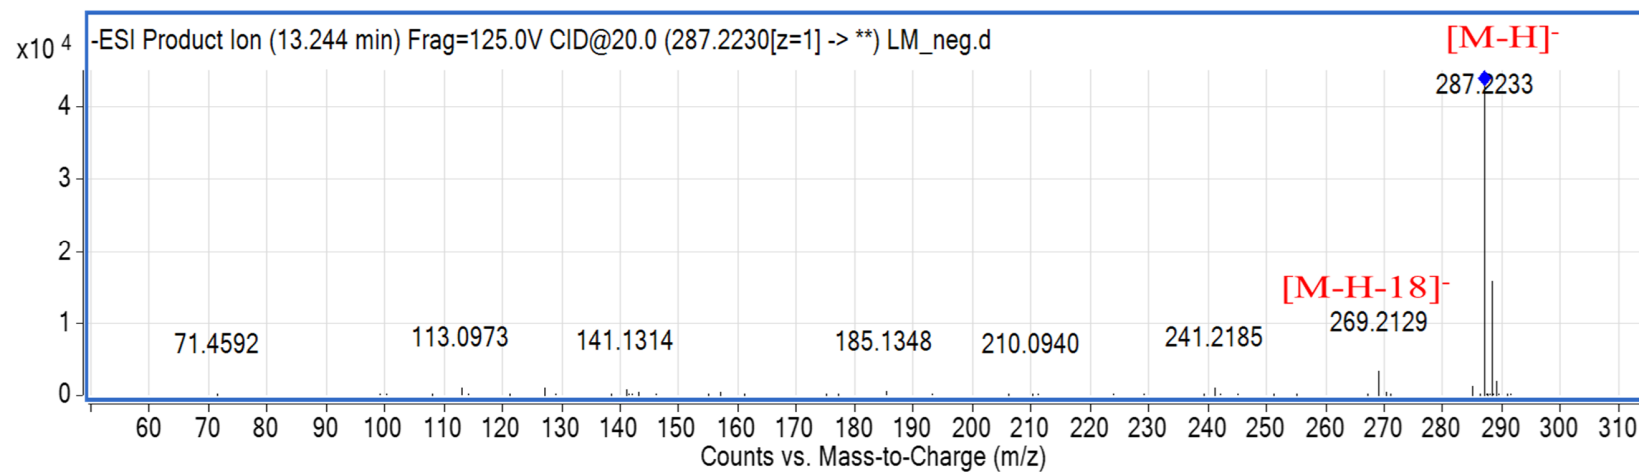

**Figure S42:** Negative mode MS/MS spectrum of dihydroxy hexadecanoic.

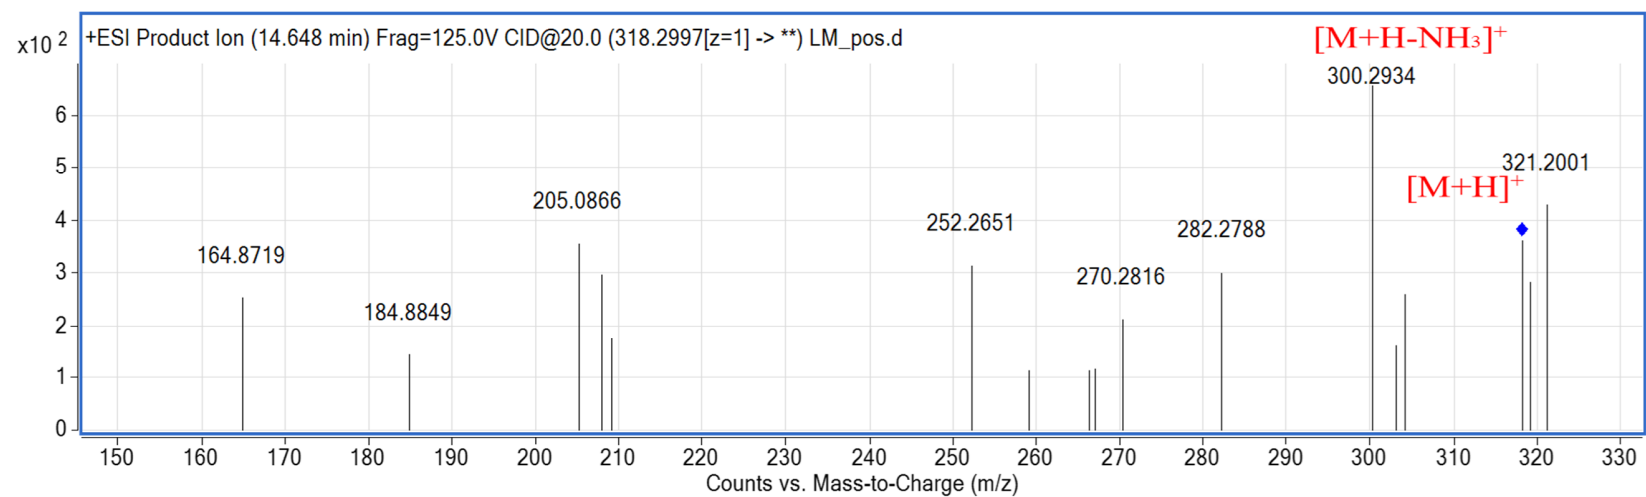

Figure S43: Positive mode MS/MS spectrum of amino octadecanetriol.

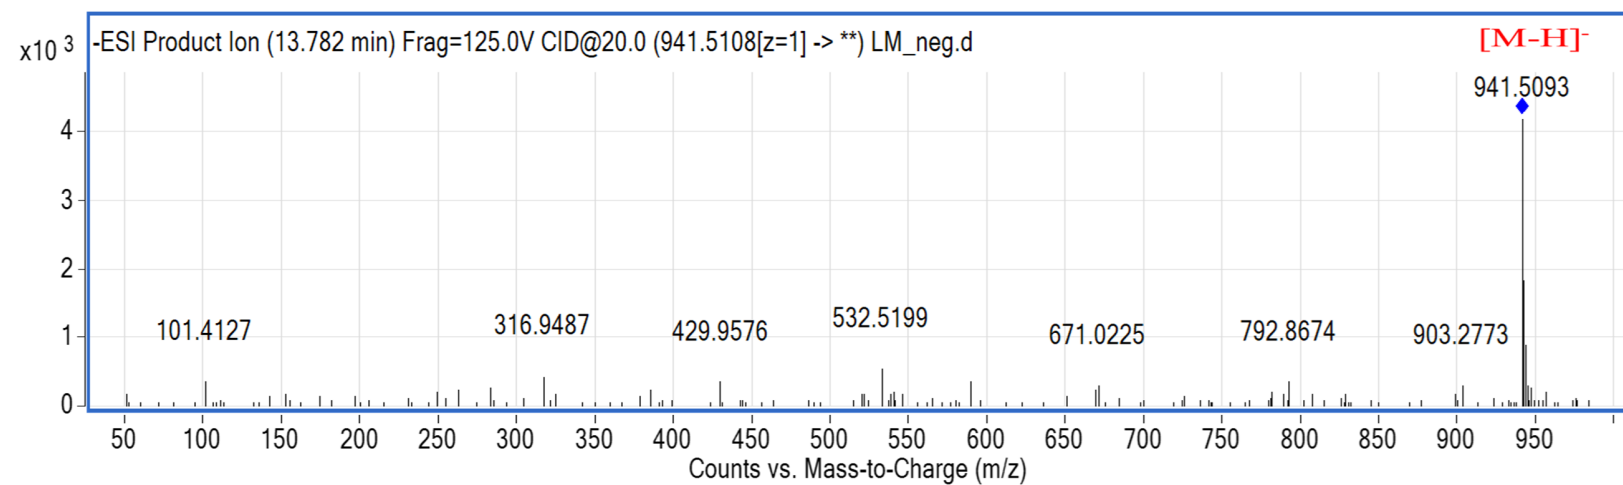

Figure S44: Negative mode MS/MS spectrum of phosphatidylinositol phosphate.
